# Supplementary material for: Direct isoperfluoropropylation of arenediazonium salts with hexafluoropropylene
Source: Royal Society of Chemistry journal article supplement (doi:10.1039/c5qo00388a), 2015-12-29

## Supporting Information

# Direct Isoperfluoropropylation of Arenediazonium Salts with Hexafluoropropylene

Xiaojun Wang,<sup>a,b</sup> Yajun Li,<sup>b</sup> Yuwei Guo,<sup>a,b</sup> Zhentong Zhu,<sup>b,c</sup> Yongming Wu<sup>\*b</sup> and Weiguo Cao<sup>\*a,b</sup>

<sup>a</sup> Department of Chemistry, Shanghai University, 99 Shangda Road, Shanghai 200444, China.

<sup>b</sup> Key Laboratory of Organofluorine Chemistry, Shanghai Institute of Organic Chemistry, Chinese Academy of Sciences, 345 Lingling Road, Shanghai 200032, China.

<sup>c</sup> School of Chemical and environmental Engineering, Shanghai Institute of Technology, 100 Haiquan Road, Shanghai 201418, China.

Email: [wgcao@staff.shu.edu.cn](mailto:wgcao@staff.shu.edu.cn) and [ymwu@sioc.ac.cn](mailto:ymwu@sioc.ac.cn)

## Table of Contents

|                                                                                                                                     |    |
|-------------------------------------------------------------------------------------------------------------------------------------|----|
| General information .....                                                                                                           | 1  |
| Synthesis of 4-(ethoxycarbonyl)benzenediazonium tetrafluoroborate <sup>1</sup> .....                                                | 1  |
| General procedure for the synthesis of isoperfluoropropylarenes from the 4-(ethoxycarbonyl)benzenediazonium tetrafluoroborate. .... | 1  |
| General procedure for the synthesis of isoperfluoropropylarenes from the aromatic amines (one-pot protocol) .....                   | 2  |
| Spectral data of the products .....                                                                                                 | 4  |
| References .....                                                                                                                    | 11 |
| Spectrum of the Products .....                                                                                                      | 12 |

## General information

Unless noted otherwise, the reactions were performed in oven-dried glassware containing a Teflon-coated stirrer bar and dry septum under a nitrogen atmosphere. Acetonitrile was dried by refluxing over  $\text{CaH}_2$  and subsequent distillation. Room temperature (rt) was range from 17 °C to 24 °C.  $^1\text{H}$  NMR spectra were recorded on a Agilent 400 spectrometer (400 MHz) spectrometer with residual solvent peak as internal reference.  $^{19}\text{F}$  NMR spectra were taken on a Agilent 400 spectrometer (376 MHz).  $^{13}\text{C}$  NMR spectra were taken a Bruker AM-400 spectrometer (101MHz) or Agilent 400 spectrometer (101MHz) with residual solvent peak as internal reference.  $\text{CDCl}_3$  was referenced to 7.26 ppm in  $^1\text{H}$  NMR and 77.00 ppm in  $^{13}\text{C}$  spectra.  $\text{DMSO-}d_6$  was referenced to 3.33 and 2.50 ppm in  $^1\text{H}$  NMR and 39.52 ppm in  $^{13}\text{C}$  spectra.  $^{19}\text{F}$  NMR chemical shifts were determined relative to  $\text{CFCl}_3$  as inter standard. Chemical shifts ( $\delta$ ) are reported in ppm, and coupling constants ( $J$ ) are in Hertz (Hz). The following abbreviations were used to designate chemical shift multiplicities: s = singlet, d = doublet, t = triplet, q = quartet, h = heptet, m = multiplet, br = broad. Column chromatography over silica gel (mesh 300-400) and hexane/ethyl acetate or pentane/ dichloromethane were used as the eluent.

Aniline and cuprous iodide were freshly purified according to the purification handbook *Purification of Laboratory Chemicals* before using. Unless otherwise noted, all other reagents were purchased from commercial suppliers and used as received.

## Synthesis of 4-(ethoxycarbonyl)benzenediazonium tetrafluoroborate<sup>1</sup>

In a 50 mL round-bottom flask, the ethyl 4-aminobenzoate (5 mmol) was dissolved in a mixture of absolute ethanol (2 mL) and an aqueous solution of  $\text{HBF}_4$  (40%, 1.6 mL, 10 mmol) and tert-butyl nitrite (1.2 mL, 10 mmol) was added dropwise to the solution at 0 °C. The reaction was stirred at room temperature for 1 h and diethyl ether (10 mL) was added to precipitate the 4-(ethoxycarbonyl)benzenediazonium tetrafluoroborate that was filtered off and washed with diethyl ether ( $3 \times 10$  mL). The 4-(ethoxycarbonyl)benzenediazonium tetrafluoroborate was dried in vacuo and was then directly used without further purification.

## General procedure for the synthesis of isoperfluoropropylarenes from the 4-

### (ethoxycarbonyl)benzenediazonium tetrafluoroborate.

In a nitrogen-filled glove box, an oven-dried 20 mL crimp cap vessel with Teflon-coated stirrer bar was charged with silver fluoride (25.4 mg, 0.20 mmol) and was brought under an atmosphere of dry nitrogen. To this vessel were added 1.5 mL of anhydrous acetonitrile and hexafluoropropylene (balloon, excess) and the mixture was stirred at room temperature and

ordinary pressure in the dark until silver fluoride precipitate is disappeared. This process takes about two hours and the isoperfluoropropyl silver is generate.<sup>2</sup> Then this solution was added to another oven-dried 20 mL crimp cap vessel with corresponding copper/cuprous salt/ copper salt (0.16 mmol) and additive in it. 4-(ethoxycarbonyl)benzenediazonium tetrafluoroborate (0.1 mmol) was dissolved in 1 mL acetonitrile and was added via syringe under nitrogen subsequently. The reaction mixture was stirred at ambient temperature for overnight. The resulting crud product was quantified by PhCF<sub>3</sub> as an internal standard.

## General procedure for the synthesis of isoperfluoropropylarenes from the aromatic amines (one-pot protocol)

**Table S1.** Details of screening equivalents, temperature and reaction time.

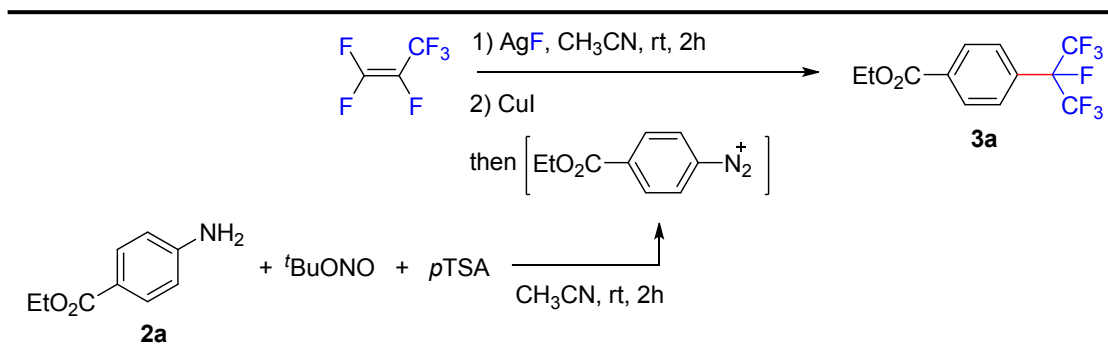

| Entry | equivalent         |      |     |     | Temperature(°C) | Time      | Yield [%] <sup>a</sup> |
|-------|--------------------|------|-----|-----|-----------------|-----------|------------------------|
|       | <sup>t</sup> BuONO | pTSA | CuI | AgF |                 |           |                        |
| 1     | 1.00               | 1.5  | 1.6 | 2.0 | rt              | overnight | 57                     |
| 2     | 1.20               | 1.5  | 1.6 | 2.0 | rt              | overnight | 75                     |
| 3     | 1.35               | 1.5  | 1.6 | 2.0 | rt              | overnight | 66                     |
| 4     | 1.20               | 1.1  | 1.6 | 2.0 | rt              | overnight | 53                     |
| 5     | 1.20               | 2.0  | 1.6 | 2.0 | rt              | overnight | 57                     |
| 6     | 1.20               | 1.5  | 1.2 | 2.0 | rt              | overnight | 32                     |
| 7     | 1.20               | 1.5  | 1.8 | 2.0 | rt              | overnight | 70                     |
| 8     | 1.20               | 1.5  | 1.6 | 1.6 | rt              | overnight | 73                     |
| 9     | 1.20               | 1.5  | 1.6 | 2.4 | rt              | overnight | 59                     |
| 10    | 1.20               | 1.5  | 1.6 | 2.0 | 0 °C            | overnight | 42                     |

|    |      |     |     |     |       |           |    |
|----|------|-----|-----|-----|-------|-----------|----|
| 11 | 1.20 | 1.5 | 1.6 | 2.0 | 40 °C | overnight | 58 |
| 12 | 1.20 | 1.5 | 1.6 | 2.0 | rt    | 20 min    | 70 |
| 13 | 1.20 | 1.5 | 1.6 | 2.0 | rt    | 200 min   | 72 |

Reaction conditions: HFP (excessive), **2a** (0.1 mmol), CH<sub>3</sub>CN (1.5 mL+1.5 mL), under N<sub>2</sub> atmosphere. a: Yield determined by <sup>19</sup>F NMR analysis versus PhCF<sub>3</sub> as an internal standard.

In a nitrogen-filled glove box, an oven-dried 20 mL crimp cap vessel (**1**) with Teflon-coated stirrer bar was charged with silver fluoride (76.2 mg, 0.60 mmol) and was brought under an atmosphere of dry nitrogen. To this vessel, 3 mL of anhydrous acetonitrile and hexafluoropropylene (balloon, excess) were added, and the mixture was stirred at room temperature under ordinary pressure in the dark until silver fluoride precipitate is disappeared. This process takes about two hours and the isoperfluoropropyl silver is generated. In the process of this reaction, in a nitrogen-filled glove box, an oven-dried 20 mL crimp cap vessel (**2**) with Teflon-coated stirrer bar was charged with p-toluenesulfonic acid (77.4 mg, 0.45 mmol) and was brought under an atmosphere of dry nitrogen. To this vessel, **2a** (49.5mg, 0.3 mmol), 3 mL of anhydrous acetonitrile and tert-butyl nitrite (37.1 mg, 0.36 mmol) were added. The reaction mixture was stirred at ambient temperature for 2 h to generate the corresponding diazonium salt. After these procedures, the reaction mixtures in crimp cap vessels (**1**) and (**2**) was added in sequence *via* syringe into an third oven-dried 20 mL crimp cap vessel with Teflon-coated stirrer bar charging with cuprous iodide (91.4 mg, 0.48 mmol) under nitrogen. The new reaction mixture was stirred at ambient temperature for overnight. The resulting mixture was diluted with Et<sub>2</sub>O (10 mL), then filtered through a short pad of celite and rinsed with diethyl ether. The resulting organic solution was add into water (10 mL) and extracted by ethyl Et<sub>2</sub>O (3×10 mL). The organic layer was dried over MgSO<sub>4</sub>, filtered and concentrated. The residue was further purified by flash chromatography on silica gel to give the desired product.

## Spectral data of the products

### 3a, ethyl 4-(perfluoropropan-2-yl)benzoate

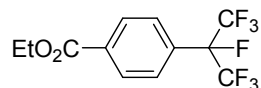

Yellow liquid;  $^1\text{H}$  NMR (400 MHz,  $\text{CDCl}_3$ )  $\delta$  8.17 (d,  $J = 8.3$  Hz, 2H), 7.70 (d,  $J = 8.4$  Hz, 2H), 4.41 (q,  $J = 7.1$  Hz, 2H), 1.41 (t,  $J = 7.1$  Hz, 3H);  $^{19}\text{F}$  NMR (376 MHz,  $\text{CDCl}_3$ )  $\delta$  -75.56 (d,  $J = 7.2$  Hz, 6F), -182.59 (hept,  $J = 7.2$  Hz, 1F);  $^{13}\text{C}$  NMR (100 MHz,  $\text{CDCl}_3$ )  $\delta$  165.53, 133.28, 131.07 (d,  $J = 20.5$  Hz), 130.10 (d,  $J = 2.2$  Hz), 125.97 (d,  $J = 10.6$  Hz), 120.78 (qd,  $J = 285.3, 27.6$  Hz), 93.191 – 89.85 (m), 61.67, 14.41; IR (film,  $\text{cm}^{-1}$ ):  $\nu$  2986, 1729, 1615, 1307, 1213, 985, 953, 723; MS (EI)  $m/z$  (relative intensity) 318 (15) [ $\text{M}^+$ ], 273 (100); HRMS (EI) calcd. For  $\text{C}_{12}\text{H}_9\text{O}_2\text{F}_7$ : 318.0491, Found: 318.0488.

### 3b, (perfluoropropan-2-yl)benzene

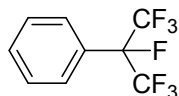

MS (EI)  $m/z$  (relative intensity) 246 [ $\text{M}^+$ ], 127 (100);

### 3c, 1-methyl-4-(perfluoropropan-2-yl)benzene

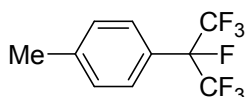

MS (EI)  $m/z$  (relative intensity) 260 [ $\text{M}^+$ ];

### 3d, 1-(tert-butyl)-4-(perfluoropropan-2-yl)benzene

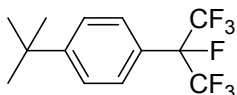

Colorless liquid;  $^1\text{H}$  NMR (400 MHz,  $\text{CDCl}_3$ )  $\delta$  7.57 – 7.47 (m, 4H), 1.35 (s, 9H);  $^{19}\text{F}$  NMR (376 MHz,  $\text{CDCl}_3$ )  $\delta$  -75.83 (d,  $J = 7.3$  Hz, 6F), -182.68 (hept,  $J = 7.3$  Hz, 1F);  $^{13}\text{C}$  NMR (100 MHz,  $\text{CDCl}_3$ )  $\delta$  154.44, 125.98, 125.57 (d,  $J = 10.3$  Hz), 123.91 (d,  $J = 20.6$  Hz), 120.88 (qd,  $J = 286.8, 28.5$  Hz), 93.40 – 90.09 (m), 34.95, 31.25; IR (film,  $\text{cm}^{-1}$ ):  $\nu$  2968, 1611, 1308, 1218, 1100, 982, 832, 711; MS (EI)  $m/z$  (relative intensity) 302 [ $\text{M}^+$ ], 287 (100); HRMS (EI) calcd. For  $\text{C}_{13}\text{H}_{13}\text{F}_7$ :

302.0905, Found: 302.0907.

**3e, 1-(benzyloxy)-4-(perfluoropropan-2-yl)benzene**

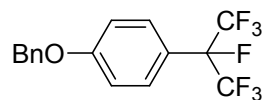

White solid, mp: 78-80 °C;  $^1\text{H}$  NMR (400 MHz,  $\text{CDCl}_3$ )  $\delta$  7.55 (d,  $J = 8.6$  Hz, 2H), 7.50 – 7.32 (m, 4H), 7.09 (d,  $J = 8.9$  Hz, 2H), 5.12 (s, 1H);  $^{19}\text{F}$  NMR (376 MHz,  $\text{CDCl}_3$ )  $\delta$  -75.96 (d,  $J = 7.3$  Hz, 6F), -181.75 (hept,  $J = 7.3$  Hz, 1F);  $^{13}\text{C}$  NMR (100 MHz,  $\text{CDCl}_3$ )  $\delta$  160.84, 136.38, 128.87, 128.42, 127.67, 127.41 (d,  $J = 10.6$  Hz), 120.84 (qd,  $J = 284.4, 27.6$  Hz), 115.25 (d,  $J = 2.0$  Hz), 93.30 – 89.99 (m), 70.32; IR (KBr,  $\text{cm}^{-1}$ ):  $\nu$  2938, 1614, 1517, 1214, 1102, 980, 853, 738, 698; MS (EI)  $m/z$  (relative intensity) 352 [ $\text{M}^+$ ], 91 (100); HRMS (EI) calcd. For  $\text{C}_{16}\text{H}_{11}\text{OF}_7$ : 352.0698, Found: 322.0700.

**3f, 1-(4-(perfluoropropan-2-yl)phenyl)ethanone**

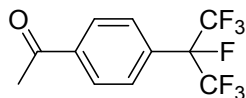

Yellow liquid;  $^1\text{H}$  NMR (400 MHz,  $\text{CDCl}_3$ )  $\delta$  8.08 (d,  $J = 8.3$  Hz, 2H), 7.73 (d,  $J = 8.6$  Hz, 2H), 2.65 (s, 3H);  $^{19}\text{F}$  NMR (376 MHz,  $\text{CDCl}_3$ )  $\delta$  -75.52 (d,  $J = 7.2$  Hz, 6F), -182.63 (hept,  $J = 7.1$  Hz, 1F);  $^{13}\text{C}$  NMR (100 MHz,  $\text{CDCl}_3$ )  $\delta$  197.09, 139.19, 131.22 (d,  $J = 20.5$  Hz), 128.78 (d,  $J = 2.2$  Hz), 126.29 (d,  $J = 10.6$  Hz), 120.50 (qd,  $J = 285.8, 28.1$  Hz), 93.16 – 89.82 (m), 26.86; IR (film,  $\text{cm}^{-1}$ ):  $\nu$  3372, 3008, 1696, 1613, 1414, 1362, 1273, 1214, 1103, 985, 830, 708; MS (EI)  $m/z$  (relative intensity) 288 [ $\text{M}^+$ ], 273 (100); HRMS (EI) calcd. For  $\text{C}_{11}\text{H}_7\text{OF}_7$ : 288.0385, Found: 288.0389.

**3g, N-(4-(perfluoropropan-2-yl)phenyl)acetamide**

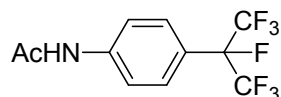

Light yellow solid; mp: 132-134 °C;  $^1\text{H}$  NMR (400 MHz,  $\text{DMSO-d}_6$ )  $\delta$  10.30 (s, 1H), 7.81 (d,  $J = 8.7$  Hz, 2H), 7.59 (d,  $J = 8.7$  Hz, 2H), 2.08 (s, 3H);  $^{19}\text{F}$  NMR (376 MHz,  $\text{CDCl}_3$ )  $\delta$  -75.88 (d,  $J = 7.2$  Hz, 6F), -182.31 (hept,  $J = 7.2$  Hz, 1F);  $^{13}\text{C}$  NMR (100 MHz,  $\text{CDCl}_3$ )  $\delta$  168.94, 140.50, 126.77 (d,  $J = 10.6$  Hz), 122.05, 120.69 (qd,  $J = 284.6, 27.3$  Hz), 119.81, 93.13 – 89.81 (m), 24.74; IR

(KBr,  $\text{cm}^{-1}$ ):  $\nu$  3301, 1674, 1604, 1306, 1266, 983, 739, 707; MS (EI)  $m/z$  (relative intensity) 303 (26) [ $\text{M}^+$ ], 192 (100); HRMS (EI) calcd. For  $\text{C}_{11}\text{H}_8\text{NOF}_7$ : 303.0494, Found: 303.0490.

### 3h, (E)-ethyl 3-(4-(perfluoropropan-2-yl)phenyl)acrylate

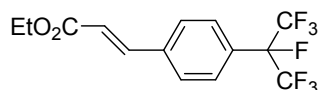

Yellow liquid;  $^1\text{H}$  NMR (400 MHz,  $\text{CDCl}_3$ )  $\delta$  7.69 (d,  $J = 16.0$  Hz, 1H), 7.63 (s, 4H), 6.51 (d,  $J = 16.0$  Hz, 1H), 4.28 (q,  $J = 7.1$  Hz, 2H), 1.34 (t,  $J = 7.1$  Hz, 3H);  $^{19}\text{F}$  NMR (376 MHz,  $\text{CDCl}_3$ )  $\delta$  -75.66 (d,  $J = 7.3$  Hz, 6F), -182.65 (hept,  $J = 7.3$  Hz, 1F);  $^{13}\text{C}$  NMR (100 MHz,  $\text{CDCl}_3$ )  $\delta$  166.54, 142.71, 137.37, 128.39, 128.16, 126.43 (d,  $J = 10.6$  Hz), 121.01, 120.63 (qd,  $J = 284.6, 28.0$  Hz), 92.88 – 89.88 (m), 60.92, 14.36; IR (film,  $\text{cm}^{-1}$ ):  $\nu$  2985, 1717, 1643, 1516, 1280, 1211, 1104, 984, 953, 827, 719; MS (EI)  $m/z$  (relative intensity) 344 (25) [ $\text{M}^+$ ], 299 (100); HRMS (EI) calcd. For  $\text{C}_{14}\text{H}_{11}\text{O}_2\text{F}_7$ : 344.0647, Found: 344.0652.

### 3i, 1-nitro-4-(perfluoropropan-2-yl)benzene

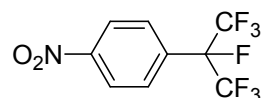

Light yellow liquid;  $^1\text{H}$  NMR (400 MHz,  $\text{CDCl}_3$ )  $\delta$  8.38 (d,  $J = 8.7$  Hz, 2H), 7.85 (d,  $J = 8.8$  Hz, 2H);  $^{19}\text{F}$  NMR (376 MHz,  $\text{CDCl}_3$ )  $\delta$  -75.39 (d,  $J = 7.2$  Hz, 6F), -181.99 (hept,  $J = 7.3$  Hz, 1F);  $^{13}\text{C}$  NMR (100 MHz,  $\text{CDCl}_3$ )  $\delta$  149.78, 133.09 (d,  $J = 20.7$  Hz), 127.41 (d,  $J = 10.8$  Hz), 124.21 (d,  $J = 2.1$  Hz), 120.30 (qd,  $J = 285.7, 27.6$  Hz), 93.01 – 89.64 (m); IR (film,  $\text{cm}^{-1}$ ):  $\nu$  3118, 1611, 1536, 1276, 1217, 1106, 986, 854, 760; MS (EI)  $m/z$  (relative intensity) 291 [ $\text{M}^+$ ], 145 (100); HRMS (EI) calcd. For  $\text{C}_9\text{H}_4\text{NO}_2\text{F}_7$ : 291.0130, Found: 291.0123.

### 3j, 1-nitro-3-(perfluoropropan-2-yl)benzene

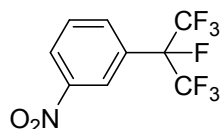

Light yellow liquid;  $^1\text{H}$  NMR (400 MHz,  $\text{CDCl}_3$ )  $\delta$  8.52 (s, 1H), 8.44 (d,  $J = 8.2$  Hz, 1H), 7.96 (d,  $J = 7.7$  Hz, 1H), 7.76 (t,  $J = 8.1$  Hz, 1H);  $^{19}\text{F}$  NMR (376 MHz,  $\text{CDCl}_3$ )  $\delta$  -75.54 (d,  $J = 7.3$  Hz, 6F), -181.94 (hept,  $J = 7.3$  Hz, 1F);  $^{13}\text{C}$  NMR (100 MHz,  $\text{CDCl}_3$ )  $\delta$  148.72, 131.68 (d,  $J = 9.9$  Hz),

130.56 (d,  $J = 1.9$  Hz), 128.95 (d,  $J = 21.3$  Hz), 126.28, 121.52 (d,  $J = 12.4$  Hz), 120.34 (qd,  $J = 285.4, 27.3$  Hz), 92.71 – 89.34 (m); IR (film,  $\text{cm}^{-1}$ ):  $\nu$  2927, 1543, 1284, 1216, 1106, 983, 906, 720; MS (EI)  $m/z$  (relative intensity) 291 [ $\text{M}^+$ ], 145 (100); HRMS (EI) calcd. For  $\text{C}_9\text{H}_4\text{NO}_2\text{F}_7$ : 291.0130, Found: 291.0126.

### 3k, 4-(perfluoropropan-2-yl)benzonitrile

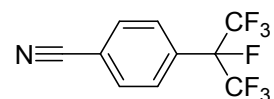

Colorless liquid;  $^1\text{H}$  NMR (400 MHz,  $\text{CDCl}_3$ )  $\delta$  7.83 (d,  $J = 8.5$  Hz, 2H), 7.76 (d,  $J = 8.4$  Hz, 2H);  $^{19}\text{F}$  NMR (376 MHz,  $\text{CDCl}_3$ )  $\delta$  -75.40 (d,  $J = 7.3$  Hz, 6F), -182.73 (hept,  $J = 7.3$  Hz, 1F);  $^{13}\text{C}$  NMR (100 MHz,  $\text{CDCl}_3$ )  $\delta$  132.82 (d,  $J = 2.1$  Hz), 131.53 (d,  $J = 20.8$  Hz), 126.86 (d,  $J = 10.8$  Hz), 120.35 (qd,  $J = 285.1, 27.6$  Hz), 117.51, 115.76, 92.93 – 89.45 (m); IR (film,  $\text{cm}^{-1}$ ):  $\nu$  2911, 1611, 1510, 1497, 1453, 1307, 1277, 1095, 1044, 979, 755; MS (EI)  $m/z$  (relative intensity) 271 (34) [ $\text{M}^+$ ], 152 (100); HRMS (EI) calcd. For  $\text{C}_{10}\text{H}_4\text{NF}_7$ : 271.0232, Found: 271.0234.

### 3l, 1-fluoro-4-(perfluoropropan-2-yl)benzene

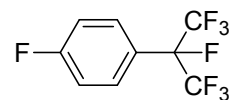

MS (EI)  $m/z$  (relative intensity) 264 [ $\text{M}^+$ ];

### 3m, 4-chloro-2-methyl-1-(perfluoropropan-2-yl)benzene

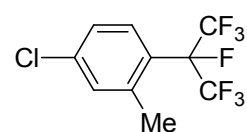

Yellow liquid;  $^1\text{H}$  NMR (400 MHz,  $\text{CDCl}_3$ )  $\delta$  7.41 (d,  $J = 8.0$  Hz, 1H), 7.32 – 7.24 (m, 2H), 2.51 (d,  $J = 9.0$  Hz, 3H);  $^{19}\text{F}$  NMR (376 MHz,  $\text{CDCl}_3$ )  $\delta$  -74.93 (d,  $J = 5.9$  Hz, 6F), -178.90 (s, 1F);  $^{13}\text{C}$  NMR (100 MHz,  $\text{CDCl}_3$ )  $\delta$  141.01, 137.05, 133.73, 128.07, 126.40, 121.02 (qd,  $J = 288.1, 28.3$  Hz), 96.09 – 92.74 (m), 21.90 (d,  $J = 15.8$  Hz); IR (film,  $\text{cm}^{-1}$ ):  $\nu$  2925, 1599, 1492, 1306, 1209, 1101, 977, 950, 818, 737; MS (EI)  $m/z$  (relative intensity) 294 (42) [ $\text{M}^+$ ], 225 (100); HRMS (EI) calcd. For  $\text{C}_{10}\text{H}_6\text{F}_7\text{Cl}$ : 294.0046, Found: 294.0042.



### 3n, 1-bromo-4-(perfluoropropan-2-yl)benzene

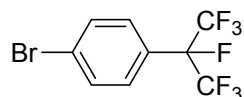

Yellow liquid;  $^1\text{H}$  NMR (400 MHz,  $\text{CDCl}_3$ )  $\delta$  7.65 (d,  $J = 8.3$  Hz, 2H), 7.48 (d,  $J = 8.5$  Hz, 2H);  $^{19}\text{F}$  NMR (376 MHz,  $\text{CDCl}_3$ )  $\delta$  -75.81 (d,  $J = 7.3$  Hz, 6F), -182.63 (hept,  $J = 7.3$  Hz, 1F);  $^{13}\text{C}$  NMR (100 MHz,  $\text{CDCl}_3$ )  $\delta$  132.42 (d,  $J = 2.1$  Hz), 127.50 (d,  $J = 10.6$  Hz), 126.10, 125.94 (d,  $J = 20.8$  Hz), 120.51 (qd,  $J = 286.9, 27.8$  Hz), 93.12 – 89.78 (m); IR (film,  $\text{cm}^{-1}$ ):  $\nu$  2925, 1599, 1462, 1305, 1222, 986, 954, 822, 734; MS (EI)  $m/z$  (relative intensity) 324[ $\text{M}^+$ ], 255(100); HRMS (EI) calcd. For  $\text{C}_9\text{H}_4\text{F}_7\text{Br}$ : 323.9385, Found: 323.9383.

### 3o, 1-iodo-2-(perfluoropropan-2-yl)benzene

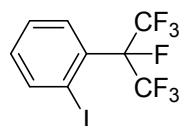

Yellow liquid;  $^1\text{H}$  NMR (400 MHz,  $\text{CDCl}_3$ )  $\delta$  8.17 (d,  $J = 8.0$  Hz, 2H), 7.51 – 7.43 (m, 2H), 7.15 (t,  $J = 7.6$  Hz, 1H);  $^{19}\text{F}$  NMR (376 MHz,  $\text{CDCl}_3$ )  $\delta$  -73.94 (d,  $J = 7.8$  Hz, 6F), -176.32 (hept,  $J = 7.7$  Hz, 1F);  $^{13}\text{C}$  NMR (100 MHz,  $\text{CDCl}_3$ )  $\delta$  144.98 (d,  $J = 2.5$  Hz), 139.63, 137.65, 132.18, 130.39, 129.32, 128.72, 128.08, 127.94 (d,  $J = 2.1$  Hz), 127.61, 120.75 (qd,  $J = 286.5, 27.8$  Hz), 108.01, 93.11 – 90.03 (m), 89.42 (d,  $J = 3.3$  Hz); IR (film,  $\text{cm}^{-1}$ ):  $\nu$  2925, 1587, 1475, 1304, 1208, 976, 948, 758, 731; MS (EI)  $m/z$  (relative intensity) 372 (100) [ $\text{M}^+$ ]; HRMS (EI) calcd. For  $\text{C}_9\text{H}_4\text{F}_7\text{I}$ : 371.9246, Found: 371.9243.

### 3p, 1-iodo-3-(perfluoropropan-2-yl)benzene

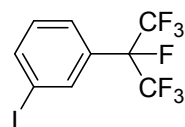

Yellow liquid;  $^1\text{H}$  NMR (400 MHz,  $\text{CDCl}_3$ )  $\delta$  7.94 (s, 1H), 7.89 (d,  $J = 8.4$  Hz, 1H), 7.58 (d,  $J = 7.9$  Hz, 1H), 7.24 (t,  $J = 8.0$  Hz, 1H);  $^{19}\text{F}$  NMR (376 MHz,  $\text{CDCl}_3$ )  $\delta$  -75.63 (d,  $J = 7.2$  Hz, 6F), -182.57 (hept,  $J = 7.2$  Hz, 1F);  $^{13}\text{C}$  NMR (100 MHz,  $\text{CDCl}_3$ )  $\delta$  140.43, 134.68 (d,  $J = 11.8$  Hz), 130.58 (d,  $J = 2.2$  Hz), 128.87 (d,  $J = 20.6$  Hz), 125.05 (d,  $J = 10.0$  Hz), 120.53 (qd,  $J = 285.3, 27.6$  Hz), 94.44 (d,  $J = 2.4$  Hz), 92.53 – 89.18 (m); IR (film,  $\text{cm}^{-1}$ ):  $\nu$  2926, 1593, 1477, 1305, 1212, 984, 764, 725; MS (EI)  $m/z$  (relative intensity) 372 (100) [ $\text{M}^+$ ]; HRMS (EI) calcd. For

C<sub>9</sub>H<sub>4</sub>F<sub>7</sub>I: 371.9246, Found: 371.9250.

### 3q, 1-iodo-4-(perfluoropropan-2-yl)benzene

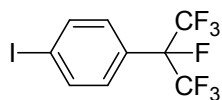

Colorless liquid; <sup>1</sup>H NMR (400 MHz, CDCl<sub>3</sub>) δ 7.86 (d, *J* = 8.2 Hz, 2H), 7.34 (d, *J* = 8.2 Hz, 2H); <sup>19</sup>F NMR (376 MHz, CDCl<sub>3</sub>) δ -75.77 (d, *J* = 7.3 Hz, 6F), -182.91 (hept, *J* = 7.3 Hz, 1F); <sup>13</sup>C NMR (100 MHz, CDCl<sub>3</sub>) δ 138.35 (d, *J* = 1.8 Hz), 127.47 (d, *J* = 10.5 Hz), 126.65 (d, *J* = 20.8 Hz), 120.50 (qd, *J* = 287.5, 29.6 Hz), 98.07, 92.85 – 90.18 (m); IR (film, cm<sup>-1</sup>): ν 2926, 1591, 1491, 1301, 1213, 984, 950, 816, 748; MS (EI) *m/z* (relative intensity) 372 (100) [M<sup>+</sup>]; HRMS (EI) calcd. For C<sub>9</sub>H<sub>4</sub>F<sub>7</sub>I: 371.9246, Found: 371.9251.

### 3r, 4-chloro-2-iodo-1-(perfluoropropan-2-yl)benzene

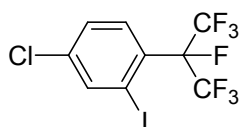

Yellow liquid; <sup>1</sup>H NMR (400 MHz, CDCl<sub>3</sub>) δ 8.18 (s, 1H), 7.50 – 7.36 (m, 2H); <sup>19</sup>F NMR (376 MHz, CDCl<sub>3</sub>) δ -74.00 (d, *J* = 7.7 Hz, 6F), -176.27 (hept, *J* = 7.7 Hz, 1F); <sup>13</sup>C NMR (100 MHz, CDCl<sub>3</sub>) δ 144.29 (d, *J* = 2.4 Hz), 137.92, 129.29, 128.30, 126.51 (d, *J* = 18.9 Hz), 120.59 (qd, *J* = 288.8, 28.7 Hz), 93.35 – 89.92 (m), 89.84 (d, *J* = 2.9 Hz); IR (film, cm<sup>-1</sup>): ν 2926, 1581, 1476, 1302, 1208, 1108, 977, 948, 819, 735; MS (EI) *m/z* (relative intensity) 406 (100) [M<sup>+</sup>]; HRMS (EI) calcd. For C<sub>9</sub>H<sub>3</sub>F<sub>7</sub>ClI: 405.8856, Found: 405.8857.

### 3s, 4-(perfluoropropan-2-yl)-1,1'-biphenyl

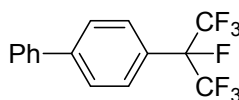

White solid, mp: 89-91 °C; <sup>1</sup>H NMR (400 MHz, CDCl<sub>3</sub>) δ 7.71 (q, *J* = 8.5 Hz, 4H), 7.62 (d, *J* = 7.1 Hz, 2H), 7.49 (t, *J* = 7.4 Hz, 2H), 7.45 – 7.36 (m, 1H); <sup>19</sup>F NMR (376 MHz, CDCl<sub>3</sub>) δ -75.68 (d, *J* = 7.3 Hz, 6F), -182.52 (hept, *J* = 7.2 Hz, 1F); <sup>13</sup>C NMR (100 MHz, CDCl<sub>3</sub>) δ 144.12, 139.75, 129.14, 128.33, 127.68 (d, *J* = 2.1 Hz), 127.38, 126.29 (d, *J* = 10.5 Hz), 125.66 (d, *J* = 20.7 Hz), 120.81 (qd, *J* = 286.6, 28.3 Hz), 93.36 – 90.04 (m); IR (KBr, cm<sup>-1</sup>): ν 3078, 1446, 1280, 1218,

1101, 981, 835, 736, 697; MS (EI)  $m/z$  (relative intensity) 322 [ $M^+$ ], 253 (100); HRMS (EI) calcd. For  $C_{15}H_9F_7$ : 322.0592, Found: 322.0587.

### 3t, 2-(perfluoropropan-2-yl)-1,1'-biphenyl

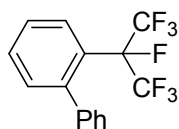

Colorless liquid;  $^1H$  NMR (400 MHz,  $CDCl_3$ )  $\delta$  7.62 (d,  $J = 7.6$  Hz, 1H), 7.54 – 7.44 (m, 2H), 7.38 – 7.33 (m, 3H), 7.28 (d,  $J = 1.5$  Hz, 1H), 7.22 (dd,  $J = 6.4, 2.8$  Hz, 2H);  $^{19}F$  NMR (376 MHz,  $CDCl_3$ )  $\delta$  -75.07 (d,  $J = 5.6$  Hz, 6F), -175.95(s, 1F);  $^{13}C$  NMR (100 MHz,  $CDCl_3$ )  $\delta$  142.99 (d,  $J = 2.8$  Hz), 141.95 (d,  $J = 5.2$  Hz), 133.78 (d,  $J = 1.8$  Hz), 130.09, 128.90, 128.34 (d,  $J = 4.7$  Hz), 127.60 (d,  $J = 2.4$  Hz), 127.43, 127.32, 127.06, 126.23 (dt,  $J = 8.6, 2.8$  Hz), 123.94 (d,  $J = 17.8$  Hz), 120.88 (qd,  $J = 286.1, 28.1$  Hz), 95.11 – 91.74 (m); IR (KBr,  $cm^{-1}$ ):  $\nu$  3065, 1598, 1484, 1441, 1271, 1205, 1113, 977, 948, 739, 701; MS (EI)  $m/z$  (relative intensity) 322 [ $M^+$ ], 183 (100); HRMS (EI) calcd. For  $C_{15}H_9F_7$ : 322.0592, Found: 322.0586.

### 3u, 2-(perfluoropropan-2-yl)naphthalene

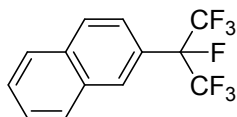

White solid, mp: 65-66 °C;  $^1H$  NMR (400 MHz,  $CDCl_3$ )  $\delta$  8.16 (s, 1H), 8.00 – 7.87 (m, 3H), 7.69 – 7.55 (m, 3H);  $^{19}F$  NMR (376 MHz,  $CDCl_3$ )  $\delta$  -75.44 (d,  $J = 7.2$  Hz, 6F), -181.96 (hept,  $J = 7.2$  Hz, 1F);  $^{13}C$  NMR (100 MHz,  $CDCl_3$ )  $\delta$  134.19, 132.64 (d,  $J = 2.1$  Hz), 129.05 (d,  $J = 2.3$  Hz), 128.91, 128.16, 127.86, 127.33, 126.64 (d,  $J = 11.9$  Hz), 124.16 (d,  $J = 20.3$  Hz), 121.76 (d,  $J = 9.4$  Hz), 120.90 (qd,  $J = 285.6, 28.1$  Hz), 93.54 – 90.18 (m); IR (KBr,  $cm^{-1}$ ):  $\nu$  3060, 1276, 1220, 981, 907, 751; MS (EI)  $m/z$  (relative intensity) 296 (76) [ $M^+$ ], 177 (100); HRMS (EI) calcd. For  $C_{13}H_7F_7$ : 296.0436, Found: 296.0433.

### 3v, 6-(perfluoropropan-2-yl)quinoline

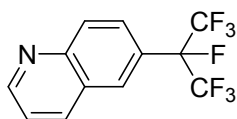

Yellow solid, mp: 46-48 °C;  $^1H$  NMR (400 MHz,  $CDCl_3$ )  $\delta$  9.04 (dd,  $J = 4.1, 1.5$  Hz, 1H), 8.32 –

8.20 (m, 2H), 8.14 (d,  $J = 1.2$  Hz, 1H), 7.89 (d,  $J = 8.9$  Hz, 1H), 7.51 (dd,  $J = 8.4, 4.2$  Hz, 1H);  $^{19}\text{F}$  NMR (376 MHz,  $\text{CDCl}_3$ )  $\delta$  -75.42 (d,  $J = 7.2$  Hz, 6F), -181.67 (hept,  $J = 7.2$  Hz, 1F);  $^{13}\text{C}$  NMR (100 MHz,  $\text{CDCl}_3$ )  $\delta$  152.61, 148.77, 1367.02, 130.74 (d,  $J = 1.7$  Hz), 127.66 (d,  $J = 1.7$  Hz), 126.81 (d,  $J = 11.9$  Hz), 125.48 (d,  $J = 9.2$  Hz), 125.06 (d,  $J = 20.5$  Hz), 122.44, 120.74 (qd,  $J = 284.8, 27.6$  Hz), 93.38 – 90.04 (m); IR (KBr,  $\text{cm}^{-1}$ ):  $\nu$  2929, 1596, 1504, 1297, 1214, 1102, 982, 894, 838, 752; MS (EI)  $m/z$  (relative intensity) 297 (66) [ $\text{M}^+$ ], 178 (100); HRMS (EI) calcd. For  $\text{C}_{12}\text{H}_6\text{NF}_7$ : 297.0388, Found: 297.0384.

### 3w, 5-(perfluoropropan-2-yl)benzo[d][1,3]dioxole

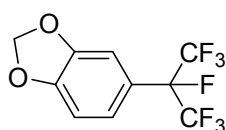

Colorless liquid;  $^1\text{H}$  NMR (400 MHz,  $\text{CDCl}_3$ )  $\delta$  7.11 (d,  $J = 8.2$  Hz, 1H), 7.05 (s, 1H), 6.90 (d,  $J = 8.3$  Hz, 1H), 6.05 (s, 2H);  $^{19}\text{F}$  NMR (376 MHz,  $\text{CDCl}_3$ )  $\delta$  -75.97 (d,  $J = 7.2$  Hz, 6F), -180.58 (hept,  $J = 7.3$  Hz, 1F);  $^{13}\text{C}$  NMR (100 MHz,  $\text{CDCl}_3$ )  $\delta$  149.99, 148.48 (d,  $J = 2.8$  Hz), 120.74 (qd,  $J = 284.9, 27.5$  Hz), 120.29 (d,  $J = 11.6$  Hz), 120.07 (d,  $J = 20.8$  Hz), 108.70 (d,  $J = 2.0$  Hz), 106.41 (d,  $J = 11.6$  Hz), 102.06, 93.20 – 89.88 (m); IR (film,  $\text{cm}^{-1}$ ):  $\nu$  2934, 2237, 1508, 1310, 1277, 1212, 986, 836, 749, 705; MS (EI)  $m/z$  (relative intensity) 290 (46) [ $\text{M}^+$ ], 221 (100); HRMS (EI) calcd. For  $\text{C}_{10}\text{H}_5\text{O}_2\text{F}_7$ : 290.0178, Found: 290.0173.

## References

1. G. Danoun, B. Bayarmagnai, and M. F. Grünberg, L. J. Gooßen, *Angew. Chem. Int. Ed.*, 2013, **52**, 7972.
2. W. T. Miller, and Jr., R. J. Burnard, *J. Am. Chem. Soc.*, 1968, **90**, 7367.

## Spectrum of the Products

### $^1\text{H}$ NMR (400 MHz, $\text{CDCl}_3$ ) spectrum of ethyl 4-(perfluoropropan-2-yl)benzoate **3a**

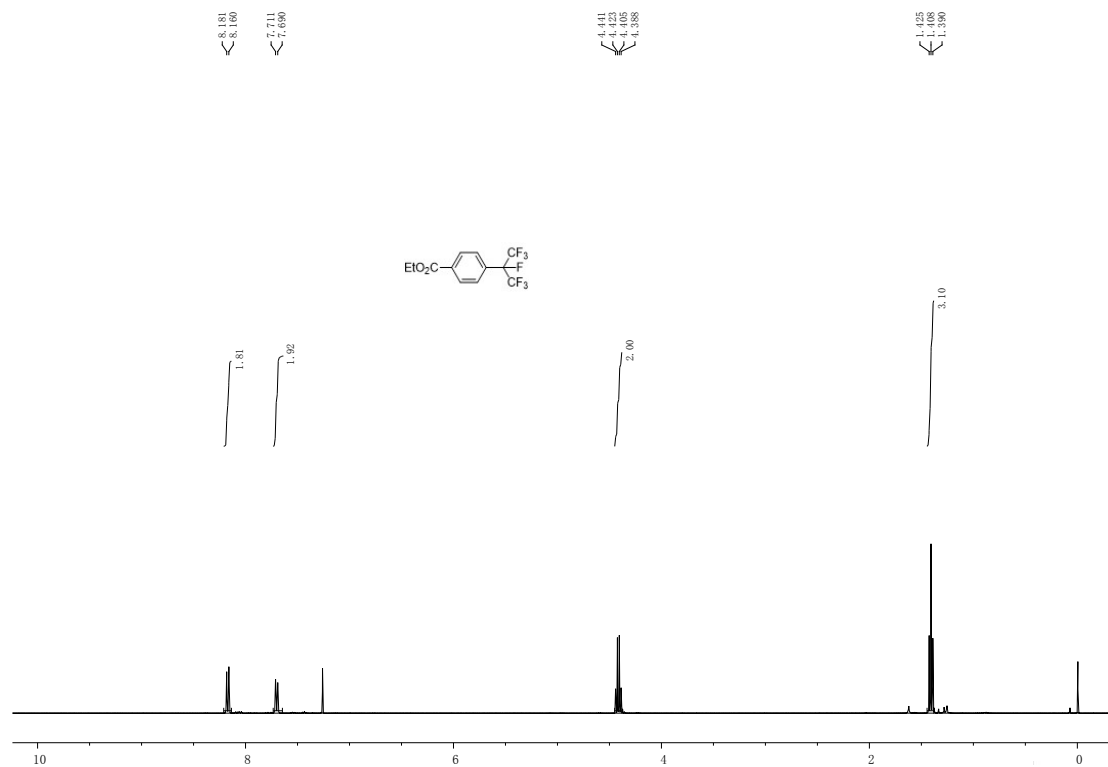

### $^{19}\text{F}$ NMR (376 MHz, $\text{CDCl}_3$ ) spectrum of ethyl 4-(perfluoropropan-2-yl)benzoate **3a**

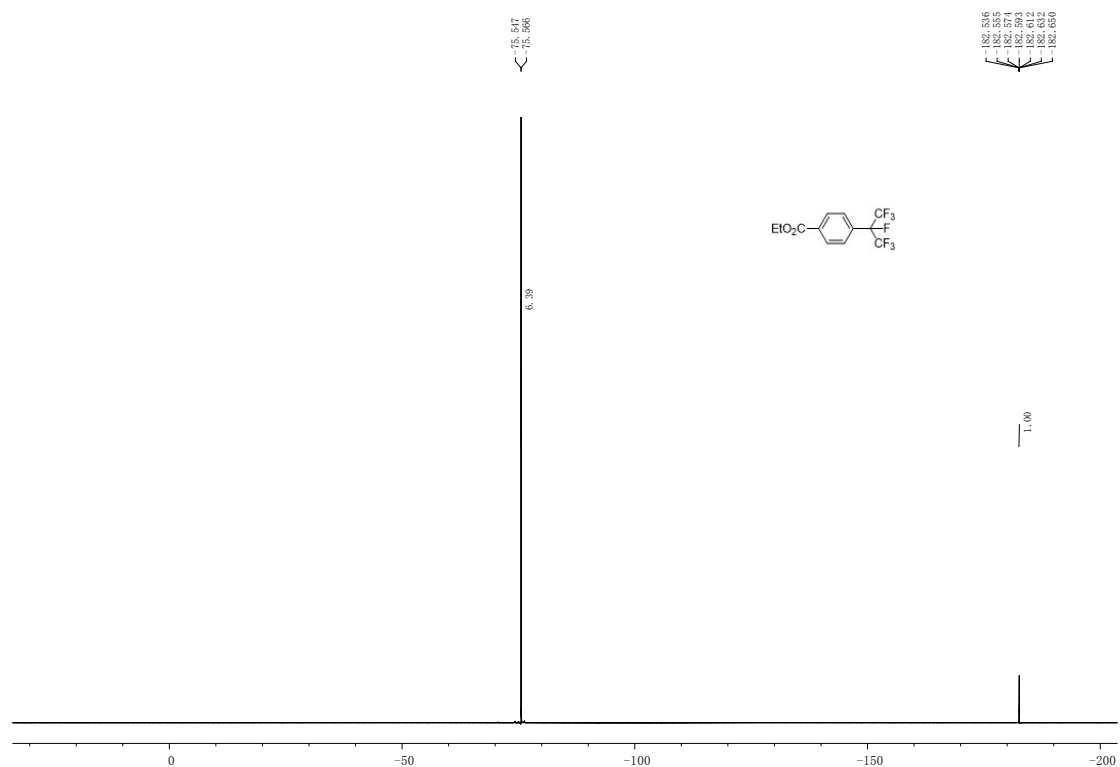

**$^{13}\text{C}$  NMR (101 MHz,  $\text{CDCl}_3$ ) spectrum of ethyl 4-(perfluoropropan-2-yl)benzoate 3a**

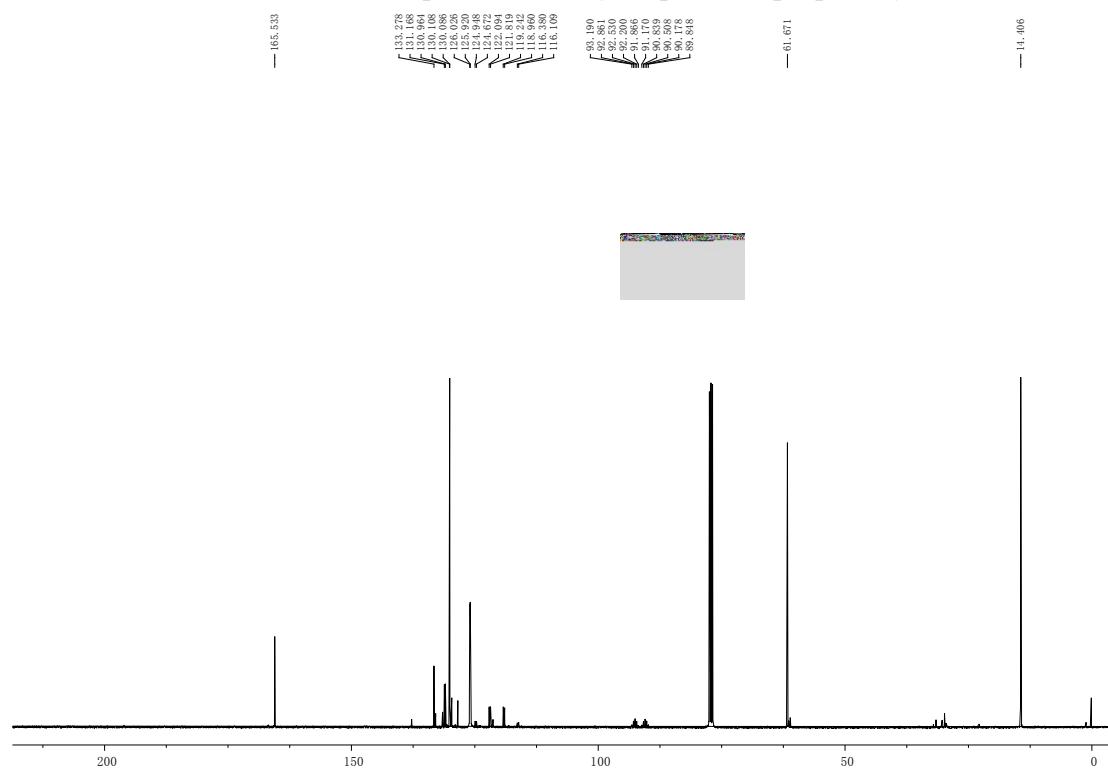

**$^1\text{H}$  NMR (400 MHz,  $\text{CDCl}_3$ ) spectrum of 1-(tert-butyl)-4-(perfluoropropan-2-yl)benzene 3d**

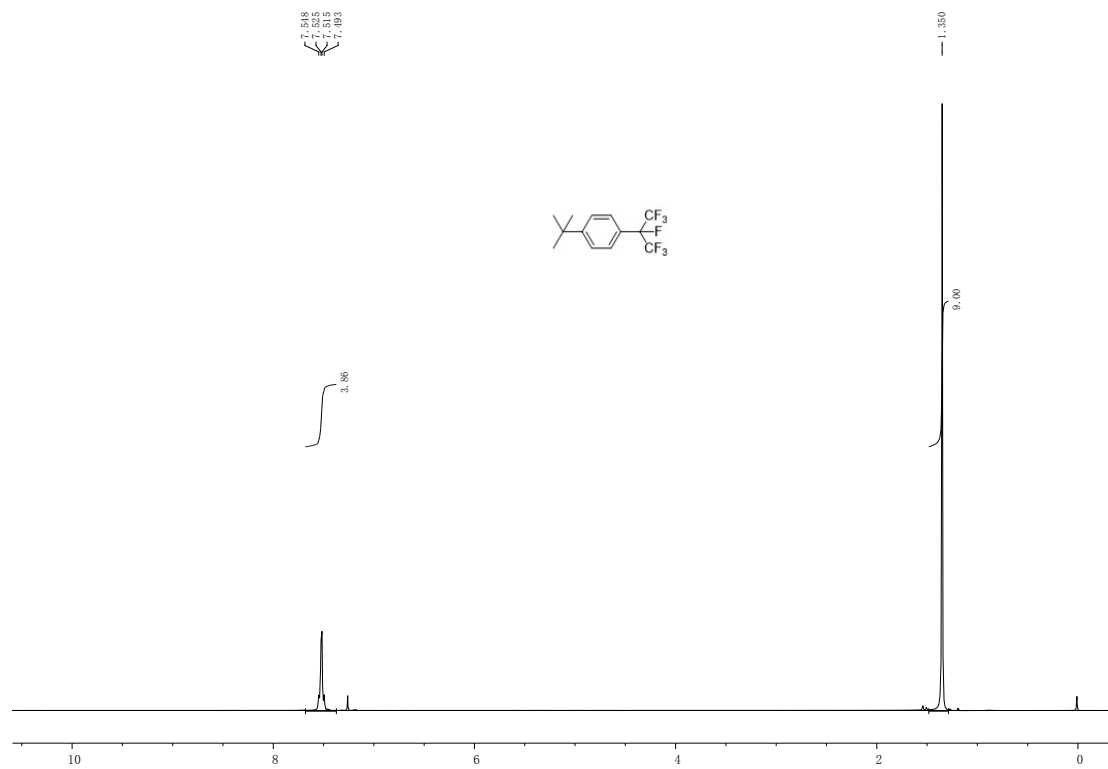

**<sup>19</sup>F NMR (376 MHz, CDCl<sub>3</sub>) spectrum of 1-(tert-butyl)-4-(perfluoropropan-2-yl)benzene 3d**

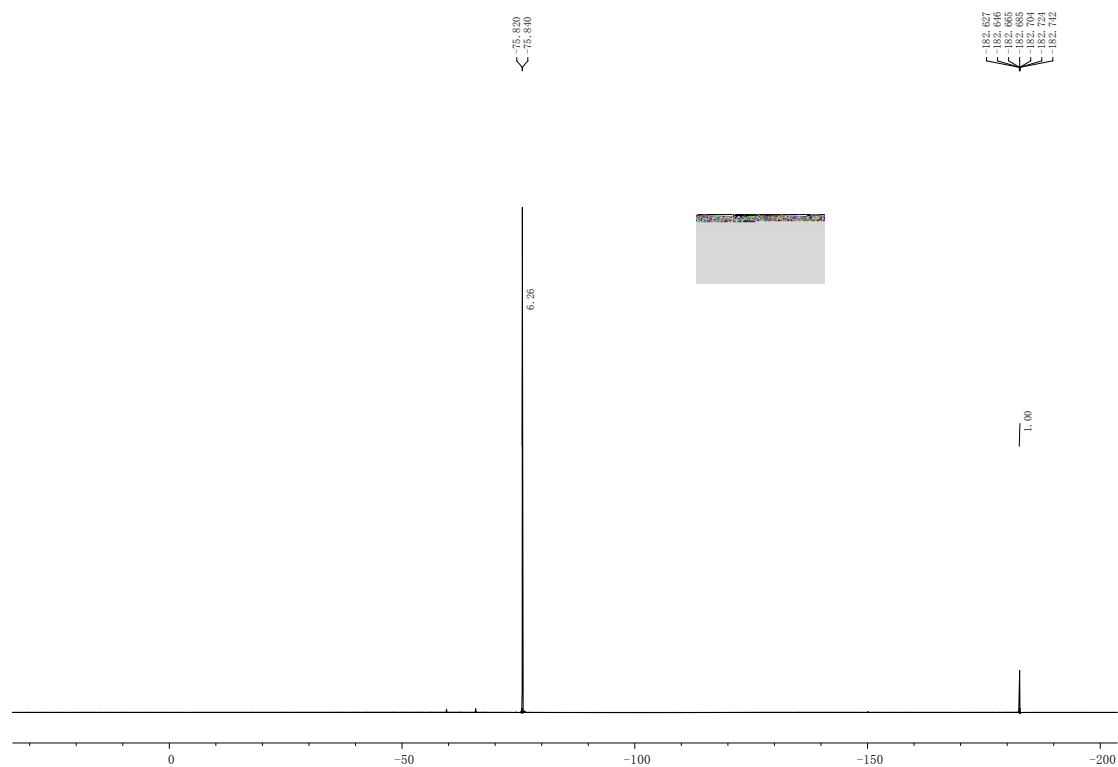

**<sup>13</sup>C NMR (101 MHz, CDCl<sub>3</sub>) spectrum of 1-(tert-butyl)-4-(perfluoropropan-2-yl)benzene 3d**

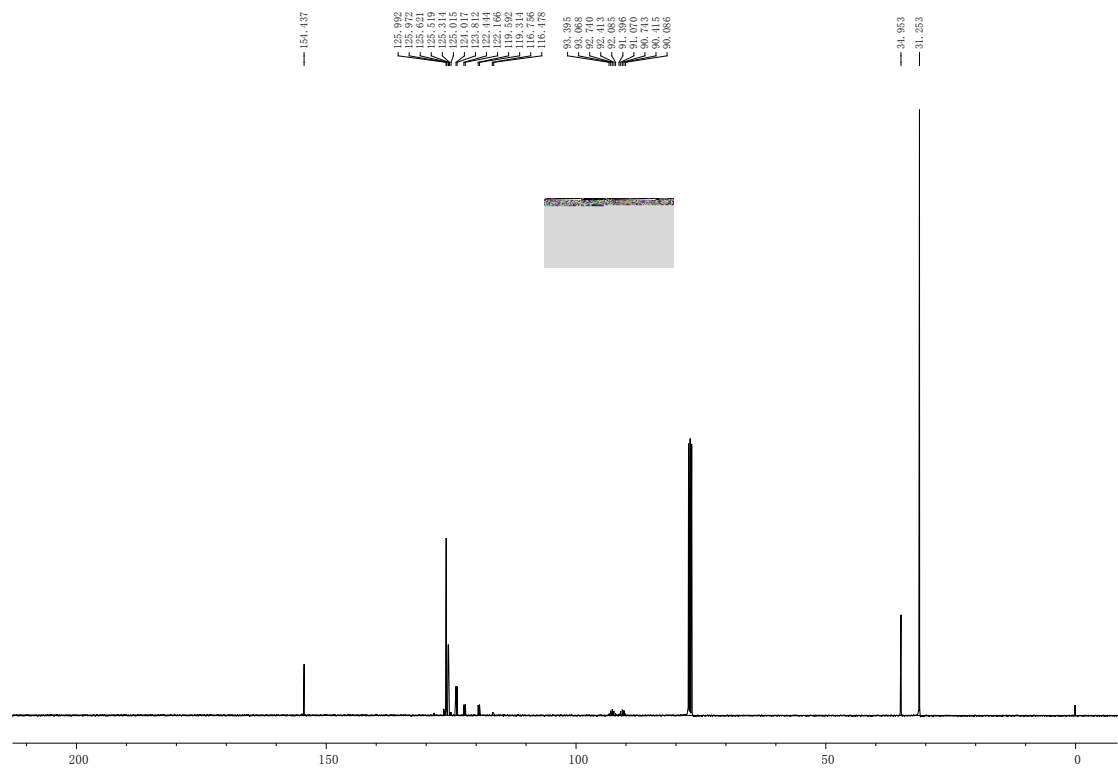

**<sup>1</sup>H NMR (400 MHz, CDCl<sub>3</sub>) spectrum of 1-(benzyloxy)-4-(perfluoropropan-2-yl)benzene 3e**

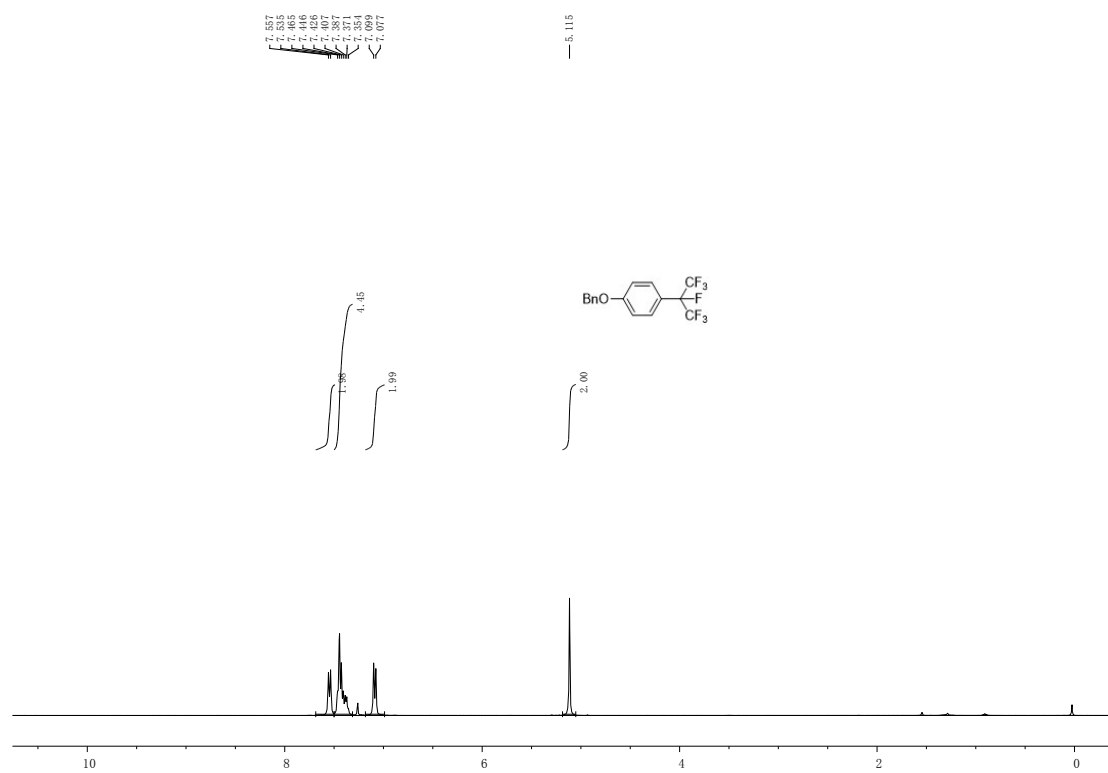

**<sup>19</sup>F NMR (376 MHz, CDCl<sub>3</sub>) spectrum of 1-(benzyloxy)-4-(perfluoropropan-2-yl)benzene 3e**

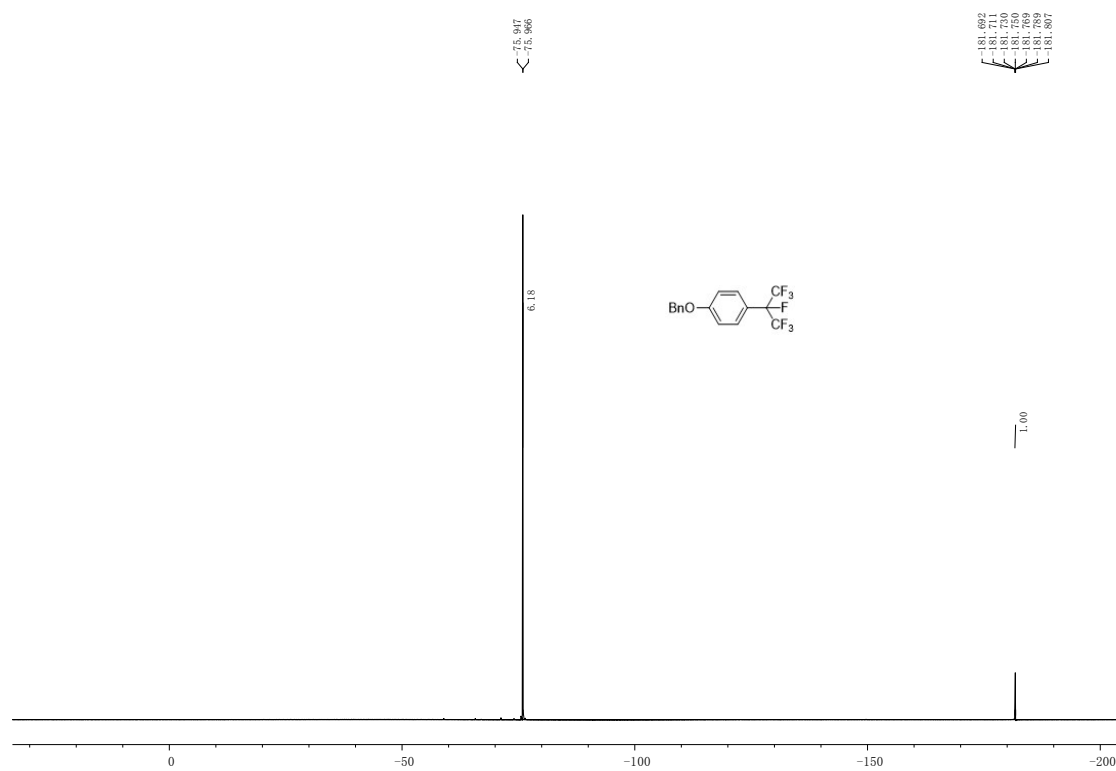



**<sup>13</sup>C NMR (101 MHz, CDCl<sub>3</sub>) spectrum of 1-(benzyloxy)-4-(perfluoropropan-2-yl)benzene 3e**

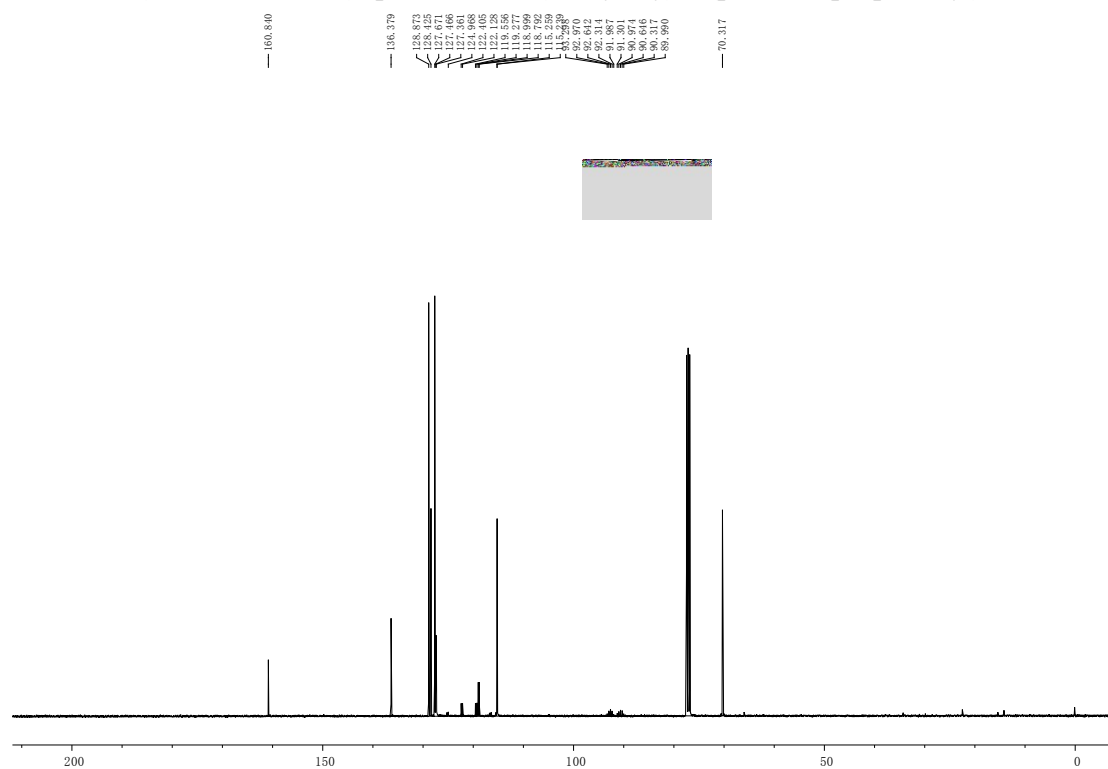

**<sup>1</sup>H NMR (400 MHz, CDCl<sub>3</sub>) spectrum of 1-(4-(perfluoropropan-2-yl)phenyl)ethanone 3f**

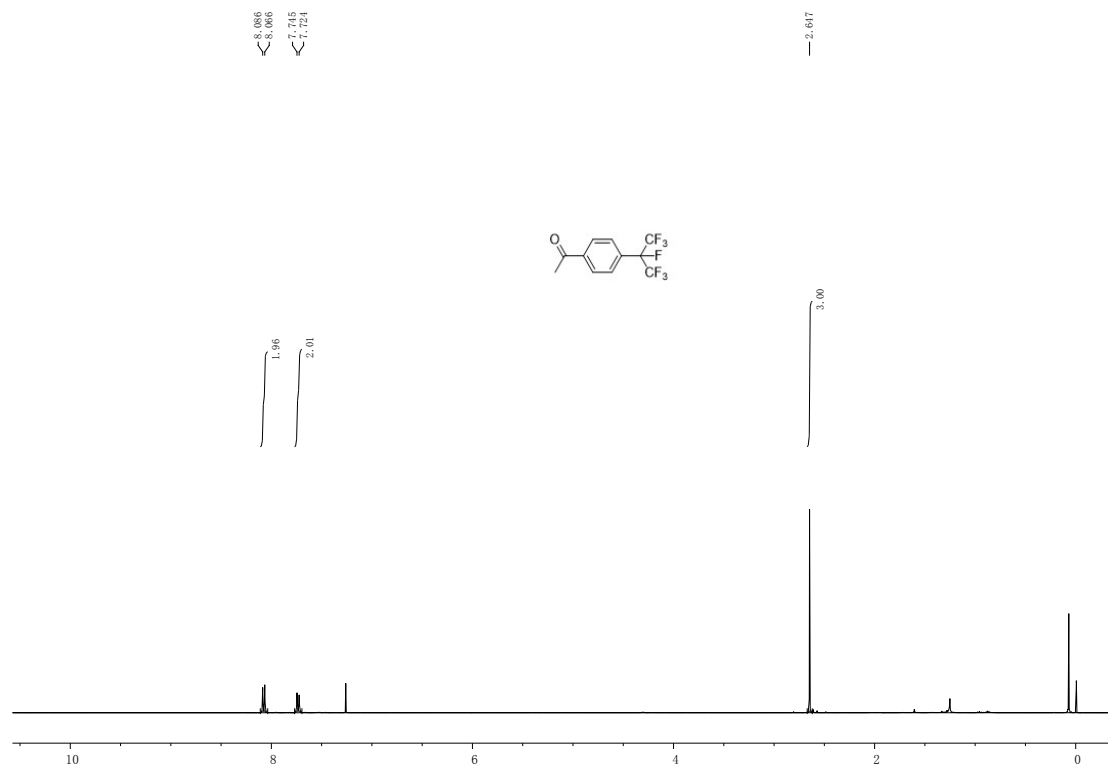

**<sup>19</sup>F NMR (376 MHz, CDCl<sub>3</sub>) spectrum of 1-(4-(perfluoropropan-2-yl)phenyl)ethanone 3f**

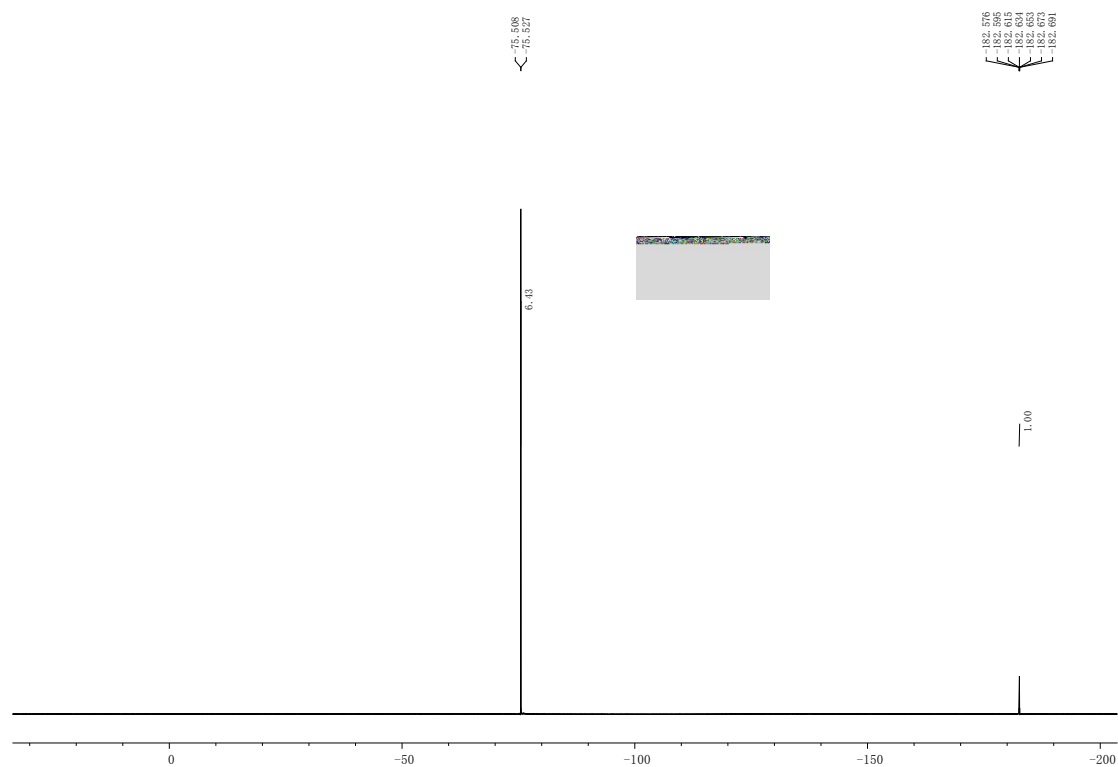

**<sup>13</sup>C NMR (101 MHz, CDCl<sub>3</sub>) spectrum of 1-(4-(perfluoropropan-2-yl)phenyl)ethanone 3f**

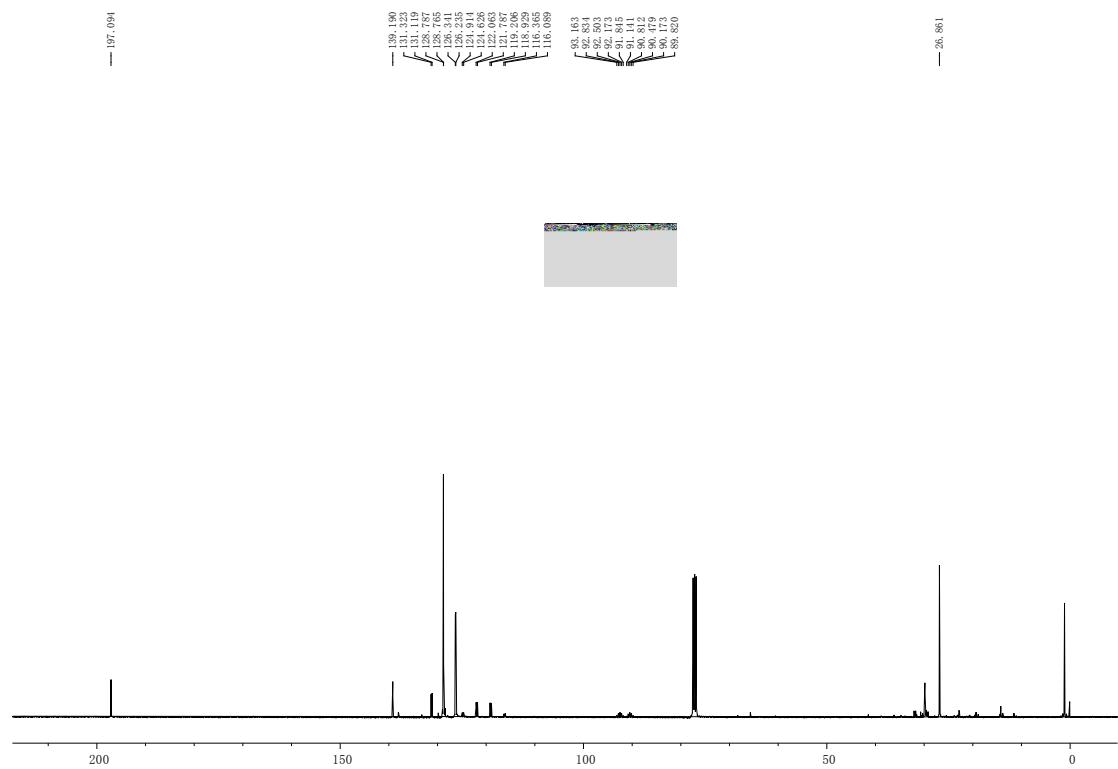

**<sup>1</sup>H NMR (400 MHz, DMSO-d<sub>6</sub>) spectrum of N-(4-(perfluoropropan-2-yl)phenyl)acetamide**

**3g**

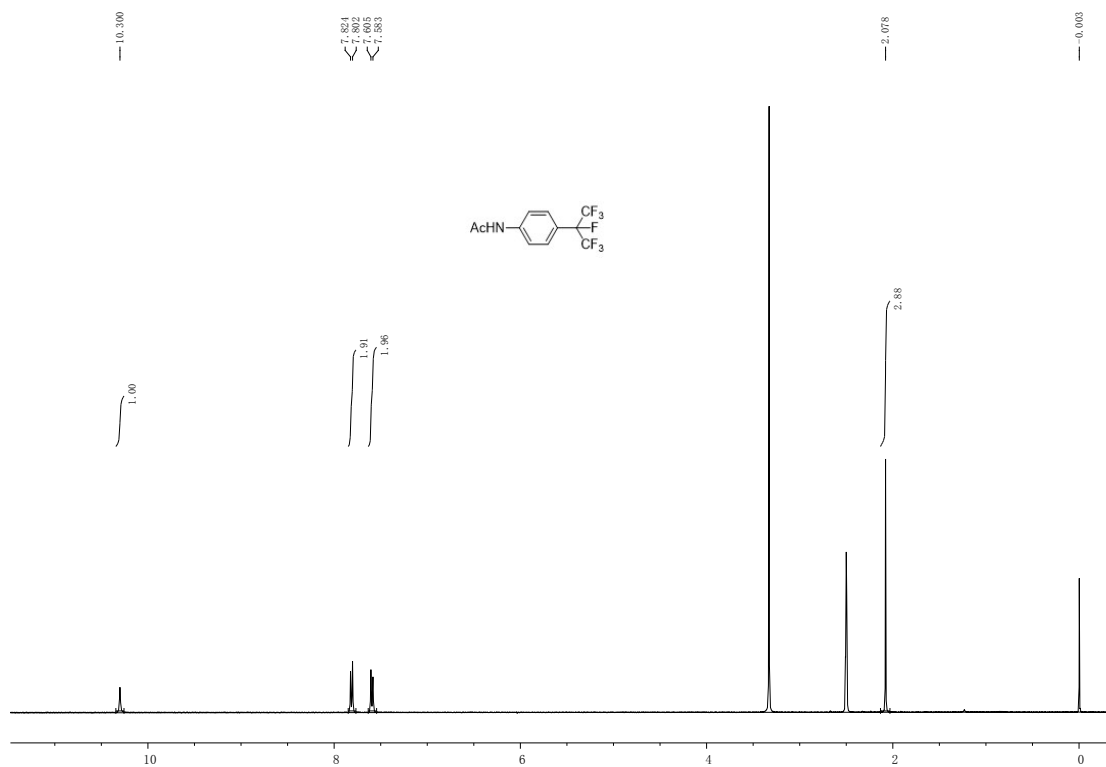

**<sup>19</sup>F NMR (376 MHz, CDCl<sub>3</sub>) spectrum of N-(4-(perfluoropropan-2-yl)phenyl)acetamide 3g**

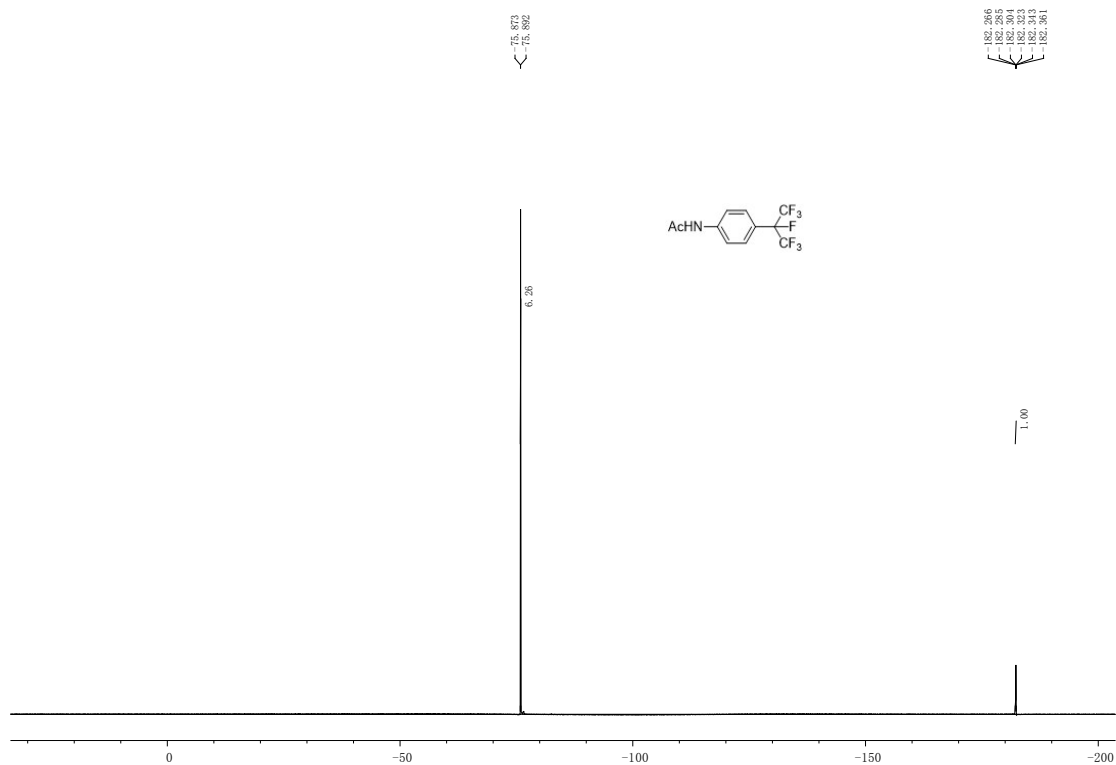

**<sup>13</sup>C NMR (101 MHz, CDCl<sub>3</sub>) spectrum of N-(4-(perfluoropropan-2-yl)phenyl)acetamide 3g**

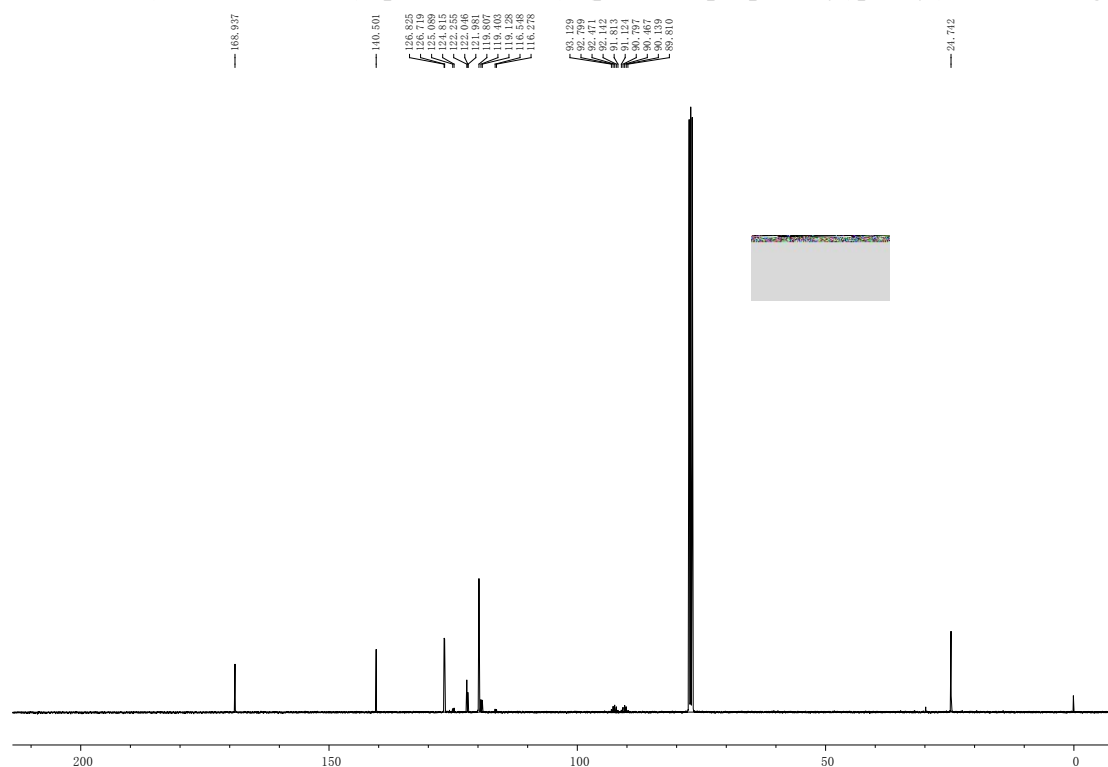

**<sup>1</sup>H NMR (400 MHz, CDCl<sub>3</sub>) spectrum of (E)-ethyl 3-(4-(perfluoropropan-2-yl)phenyl)acrylate 3h**

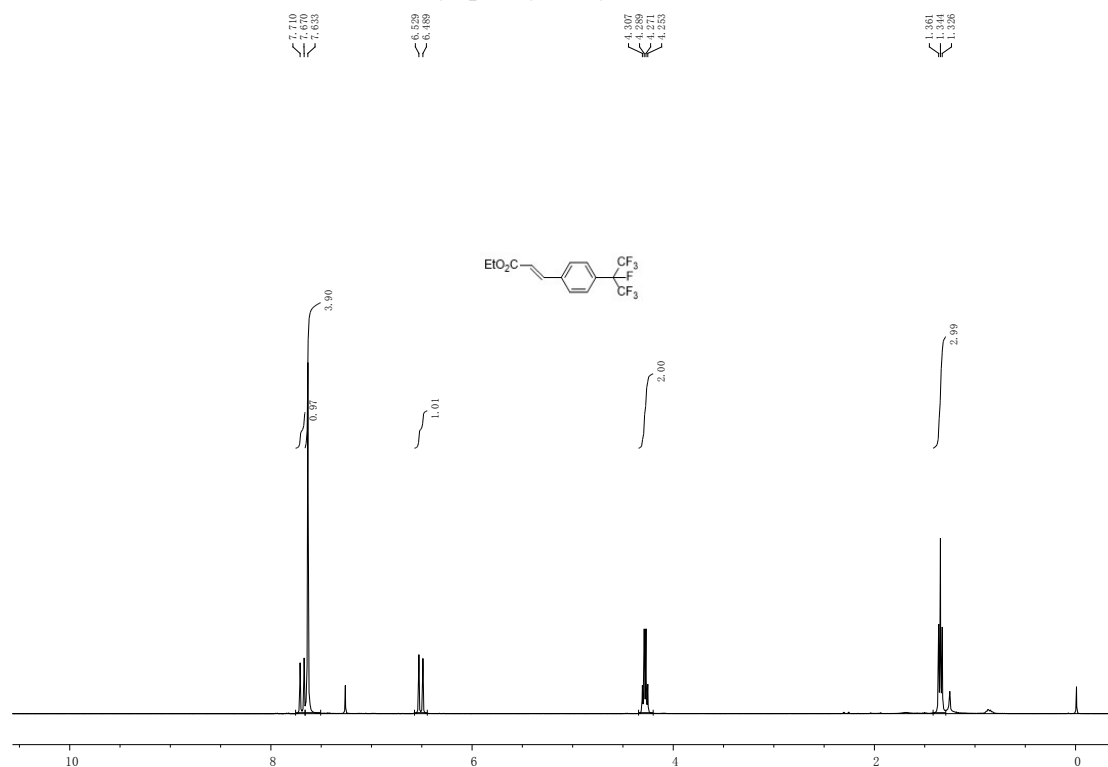

**<sup>19</sup>F NMR (376 MHz, CDCl<sub>3</sub>) spectrum of (E)-ethyl 3-(4-(perfluoropropan-2-yl)phenyl)acrylate 3h**

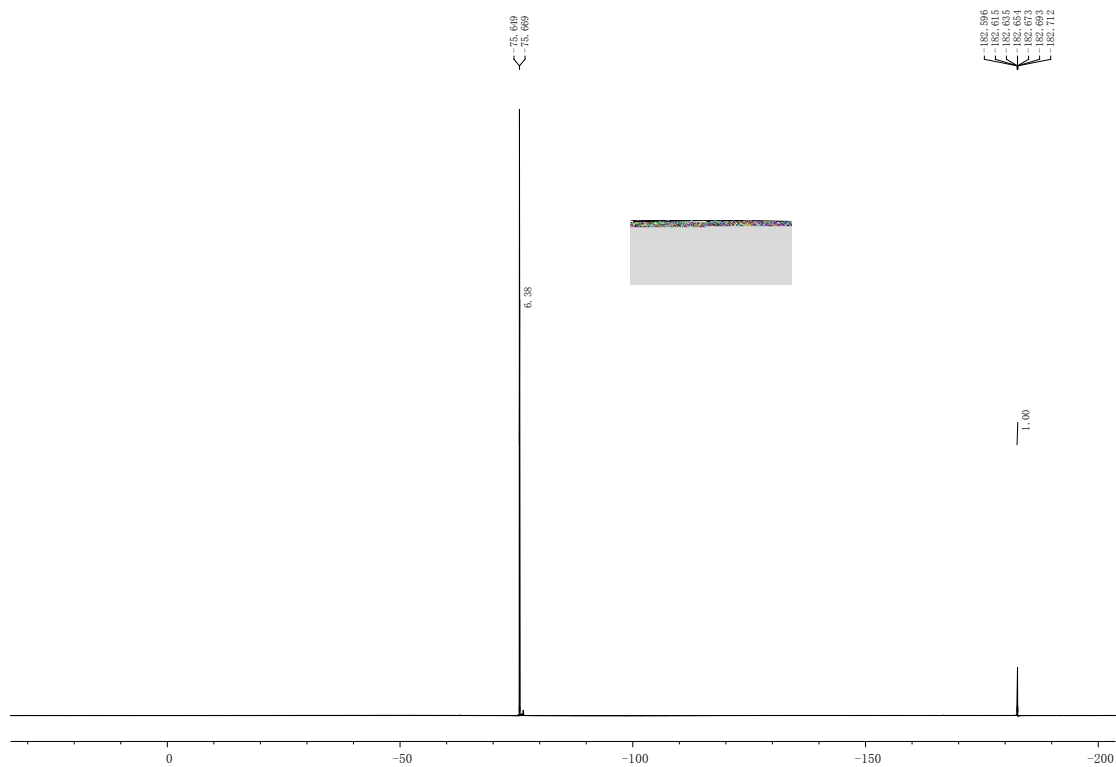

**<sup>13</sup>C NMR (101 MHz, CDCl<sub>3</sub>) spectrum of 3-(4-(perfluoropropan-2-yl)phenyl)acrylate 3h**

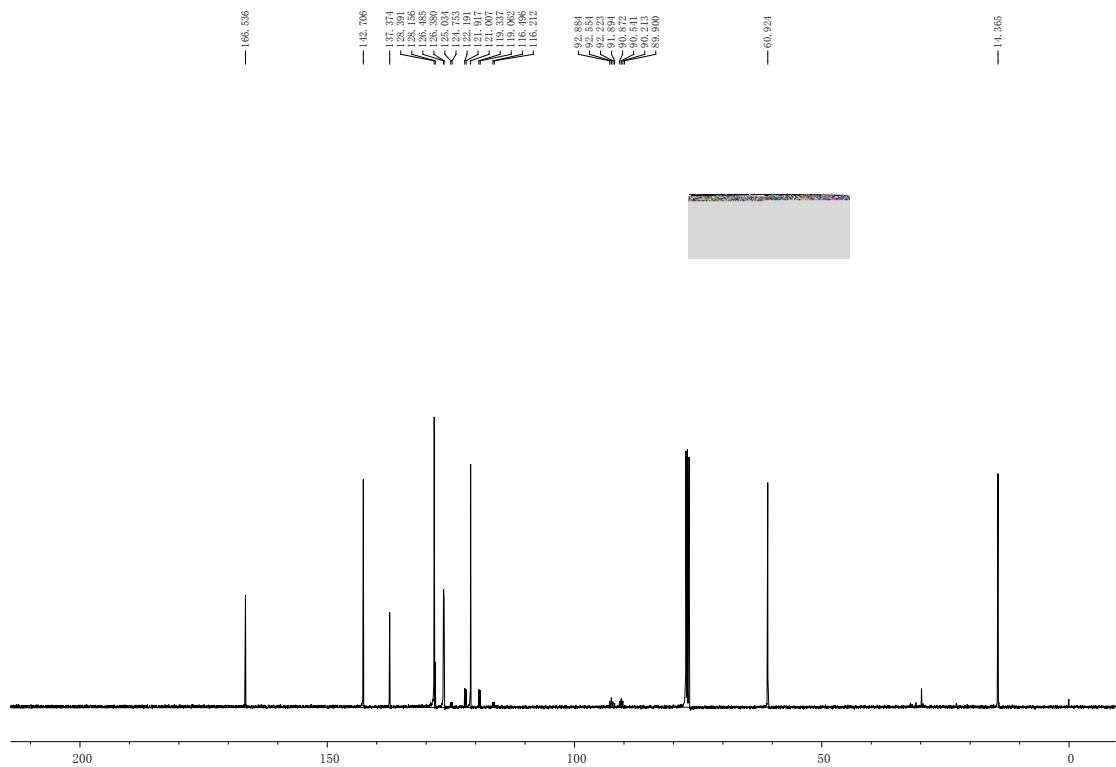

**<sup>1</sup>H NMR (400 MHz, CDCl<sub>3</sub>) spectrum of 1-nitro-4-(perfluoropropan-2-yl)benzene 3i**

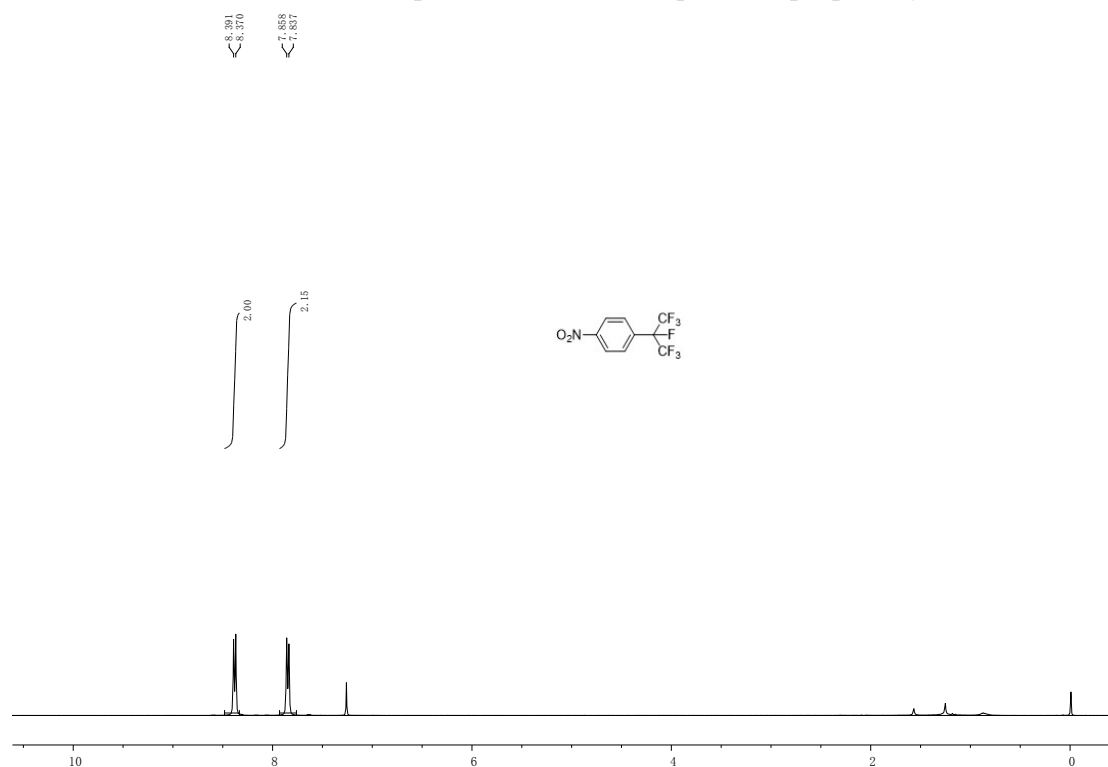

**<sup>19</sup>F NMR (376 MHz, CDCl<sub>3</sub>) spectrum of 1-nitro-4-(perfluoropropan-2-yl)benzene 3i**

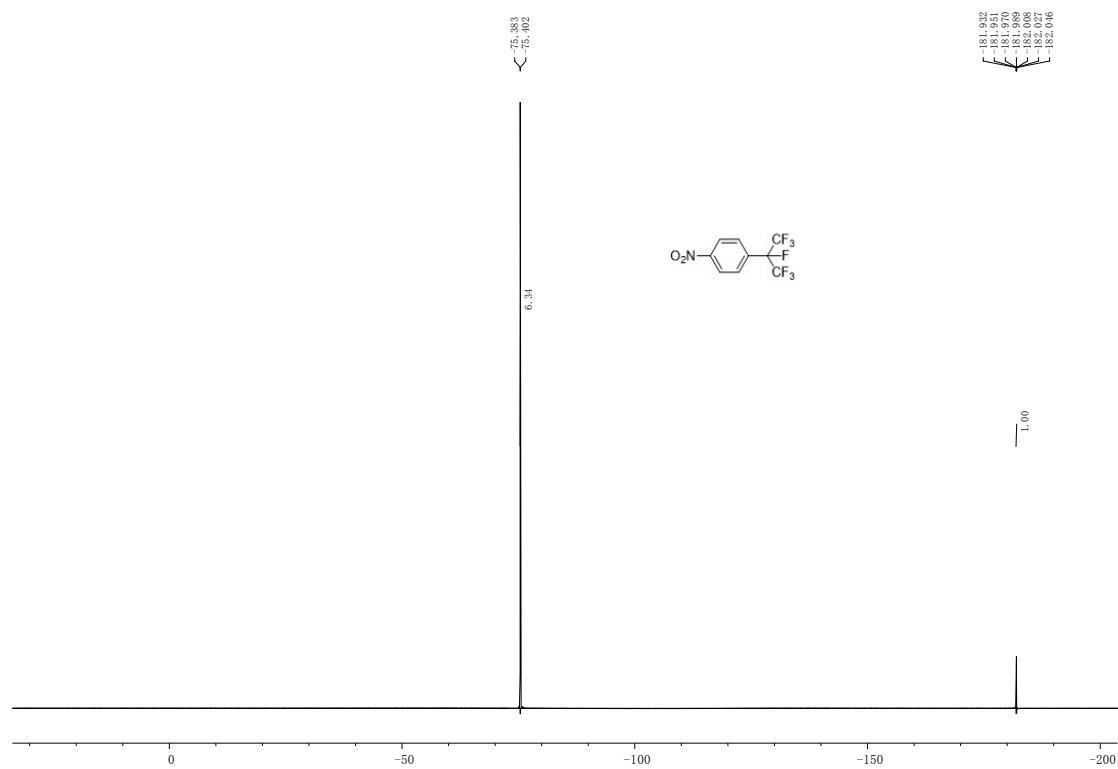

**<sup>13</sup>C NMR (101 MHz, CDCl<sub>3</sub>) spectrum of 1-nitro-4-(perfluoropropan-2-yl)benzene 3i**

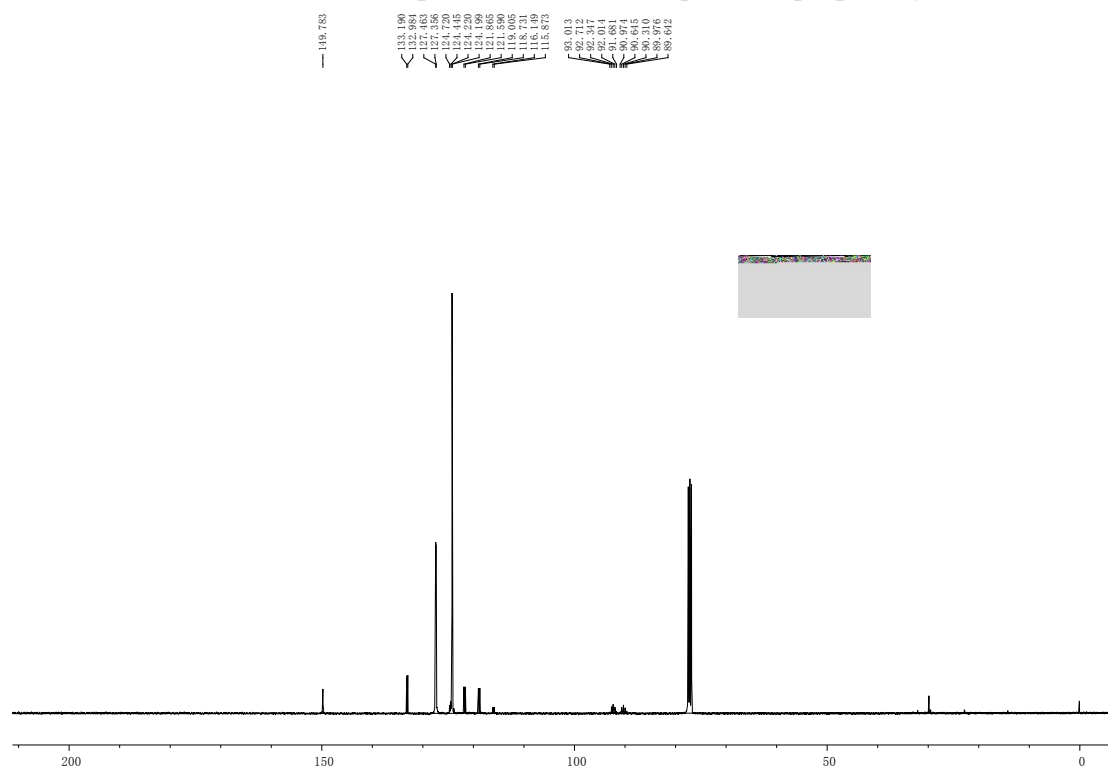

**<sup>1</sup>H NMR (400 MHz, CDCl<sub>3</sub>) spectrum of 1-nitro-3-(perfluoropropan-2-yl)benzene 3j**

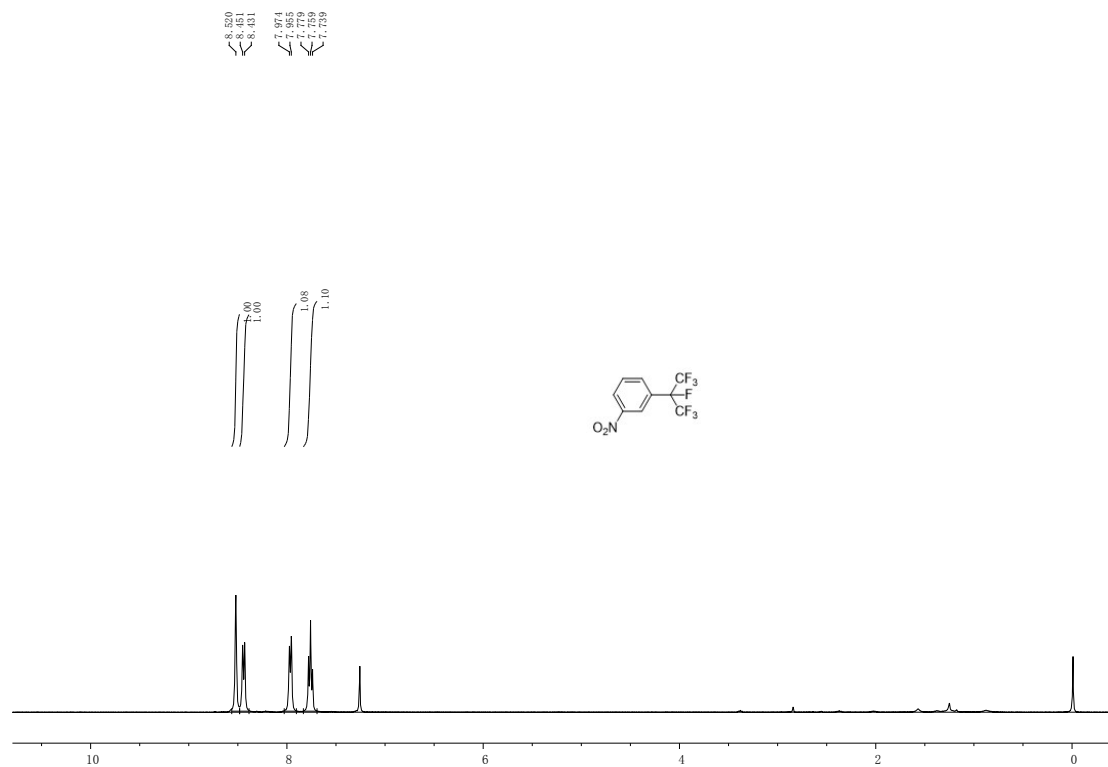

**<sup>19</sup>F NMR (376 MHz, CDCl<sub>3</sub>) spectrum of 1-nitro-3-(perfluoropropan-2-yl)benzene 3j**

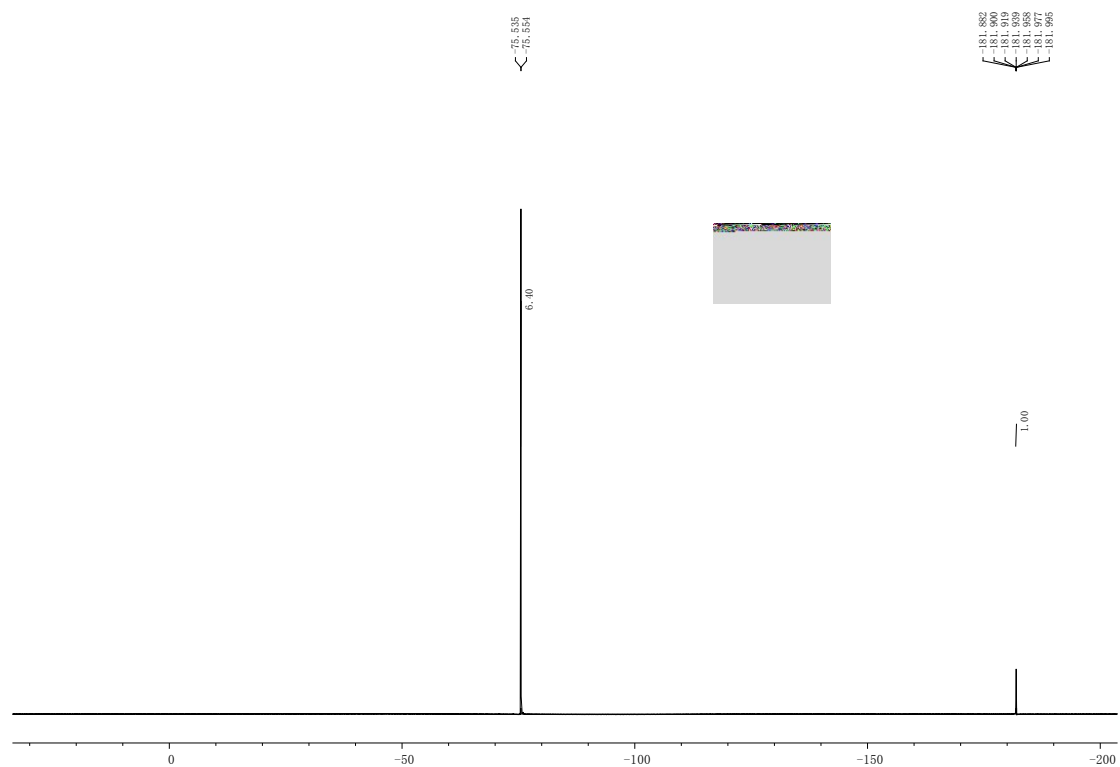

**<sup>13</sup>C NMR (101 MHz, CDCl<sub>3</sub>) spectrum of 1-nitro-3-(perfluoropropan-2-yl)benzene 3j**

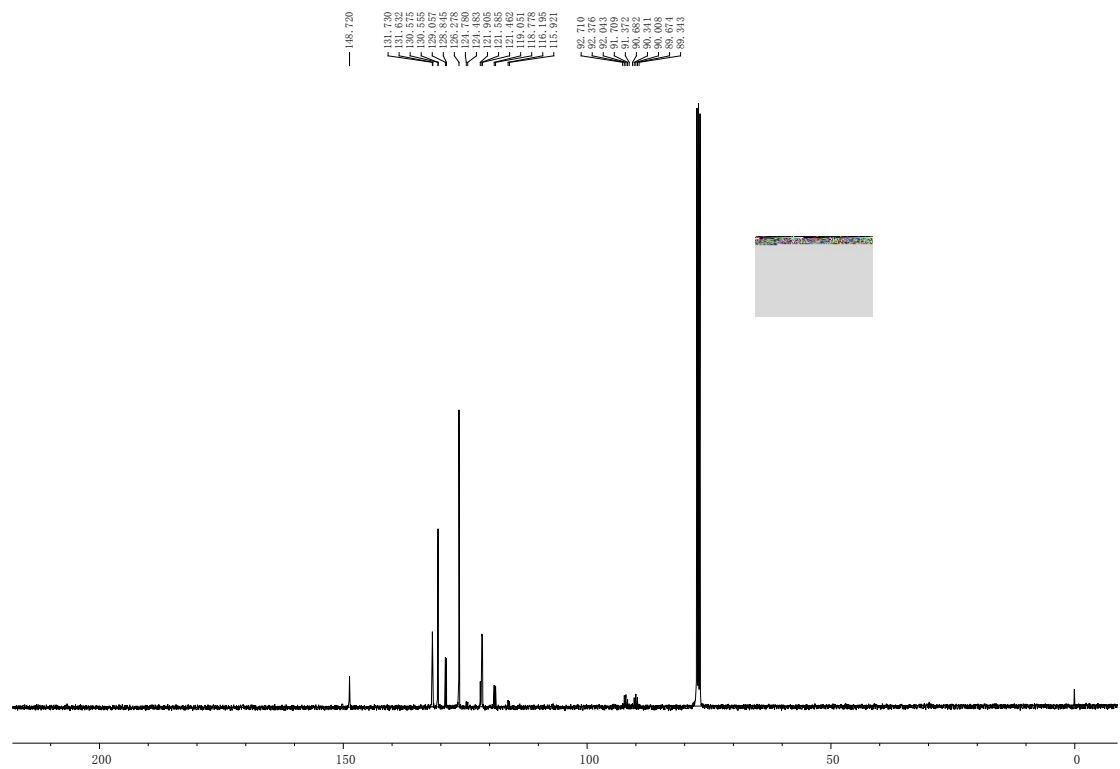



**<sup>1</sup>H NMR (400 MHz, CDCl<sub>3</sub>) spectrum of 4-(perfluoropropan-2-yl)benzonitrile 3k**

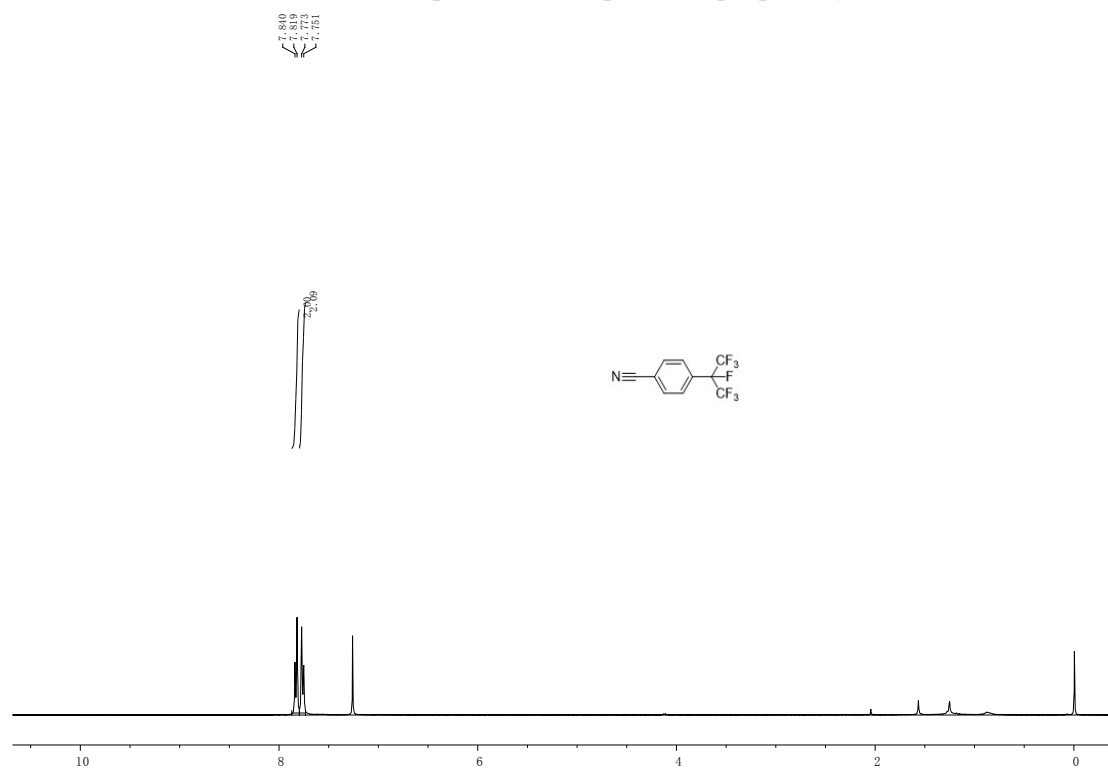

**<sup>19</sup>F NMR (376 MHz, CDCl<sub>3</sub>) spectrum of 4-(perfluoropropan-2-yl)benzonitrile 3k**

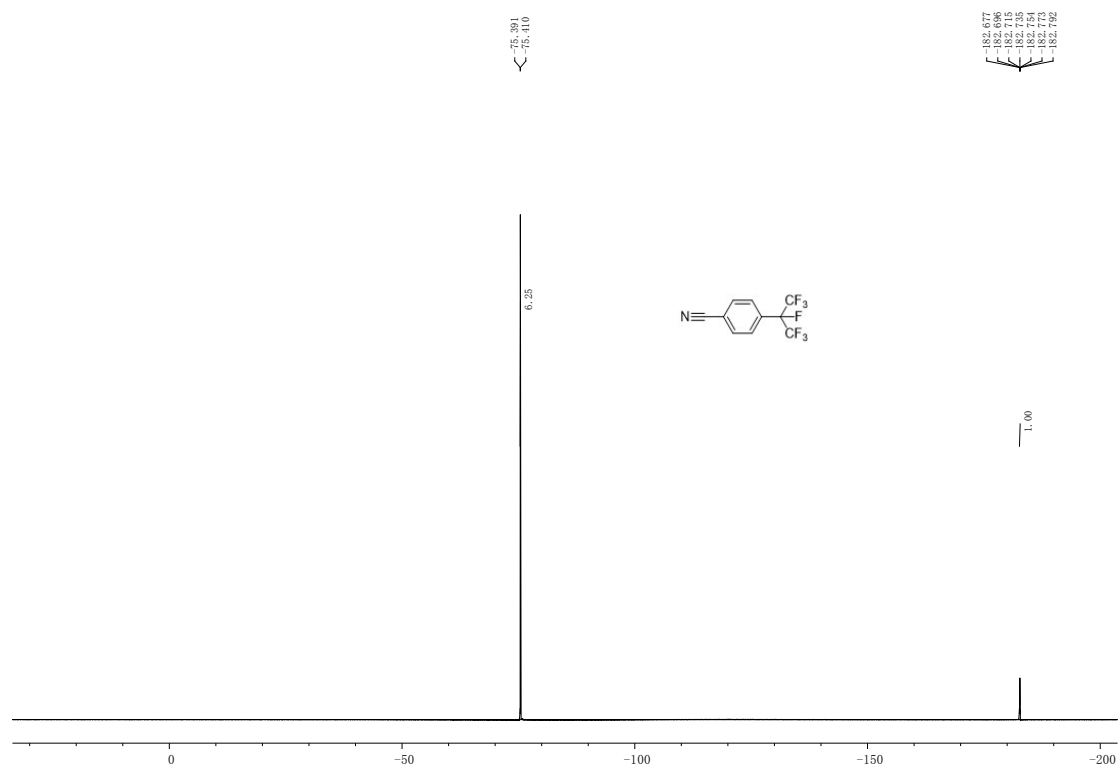

**<sup>13</sup>C NMR (101 MHz, CDCl<sub>3</sub>) spectrum of 4-(perfluoropropan-2-yl)benzonitrile 3k**

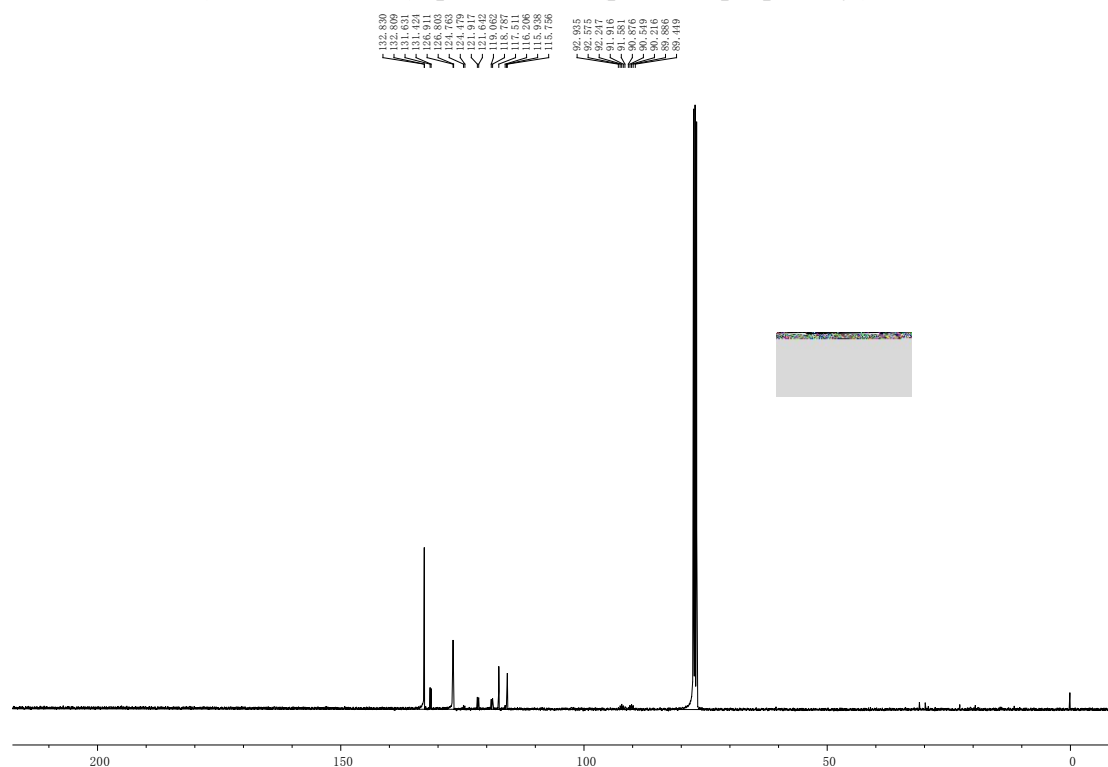

**<sup>1</sup>H NMR (400 MHz, CDCl<sub>3</sub>) spectrum of 4-chloro-2-methyl-1-(perfluoropropan-2-yl)benzene 3m**

**3m**

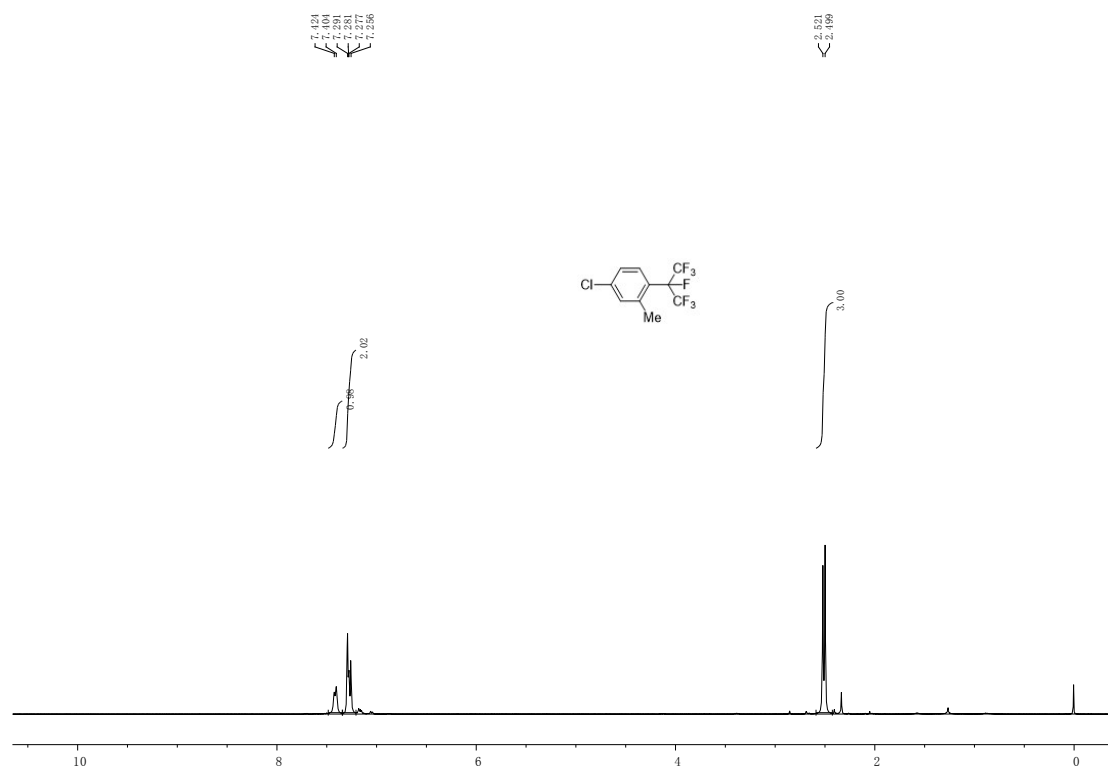

**<sup>19</sup>F NMR (376 MHz, CDCl<sub>3</sub>) spectrum of 4-chloro-2-methyl-1-(perfluoropropan-2-yl)benzene 3m**

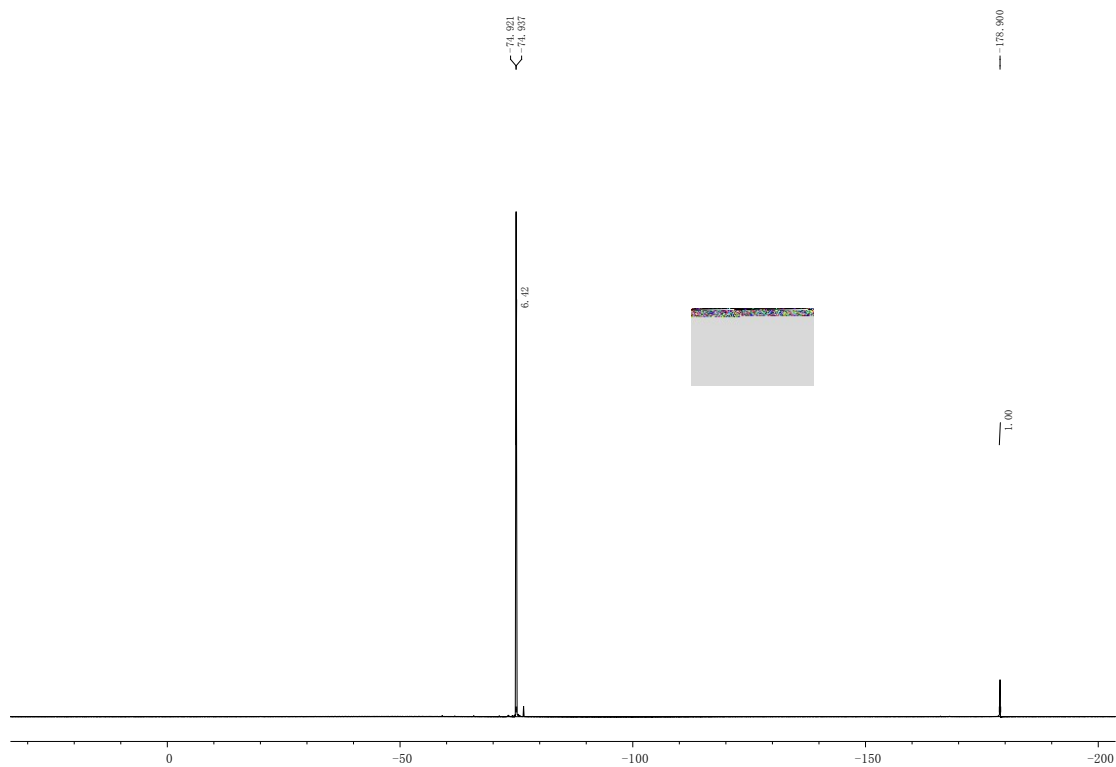

**<sup>13</sup>C NMR (101 MHz, CDCl<sub>3</sub>) spectrum of 4-chloro-2-methyl-1-(perfluoropropan-2-yl)benzene 3m**

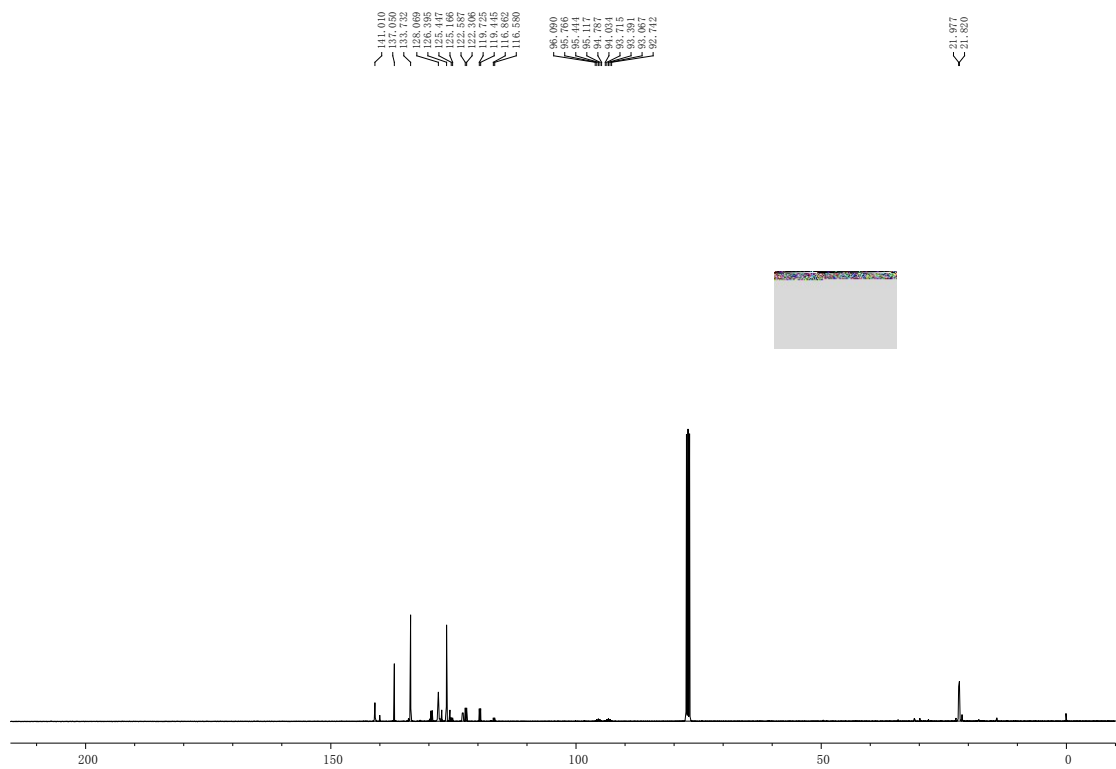

**<sup>1</sup>H NMR (400 MHz, CDCl<sub>3</sub>) spectrum of 1-bromo-4-(perfluoropropan-2-yl)benzene 3n**

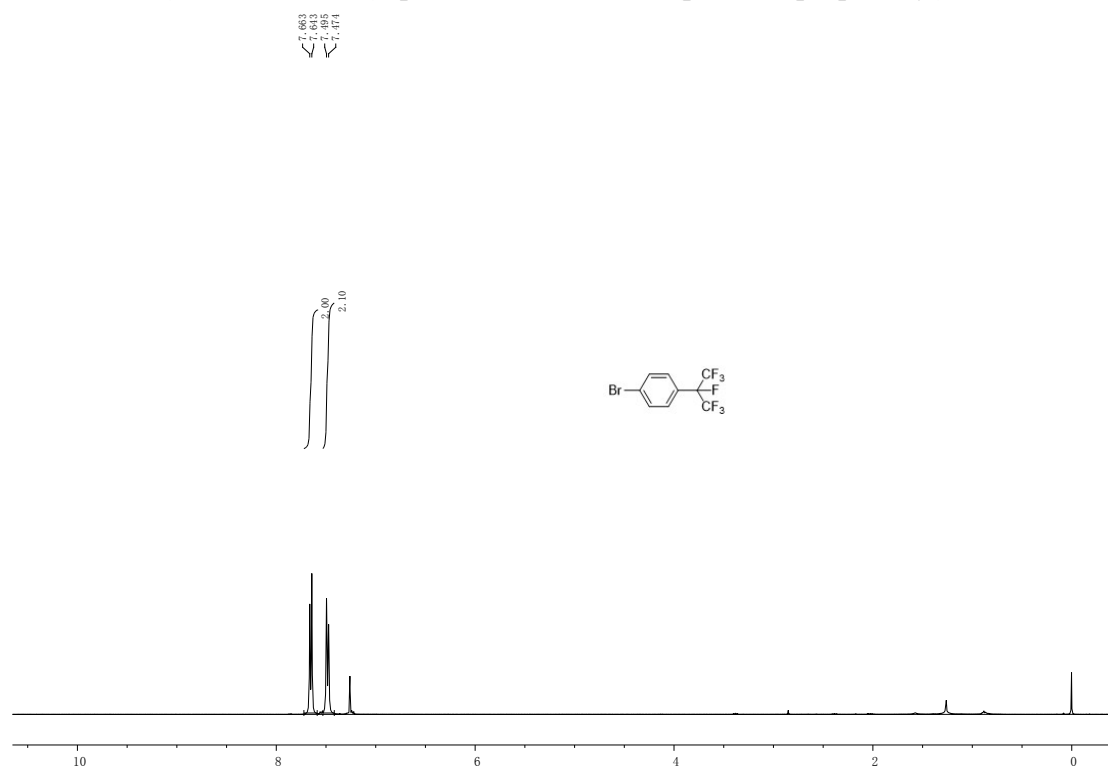

**<sup>19</sup>F NMR (376 MHz, CDCl<sub>3</sub>) spectrum of 1-bromo-4-(perfluoropropan-2-yl)benzene 3n**

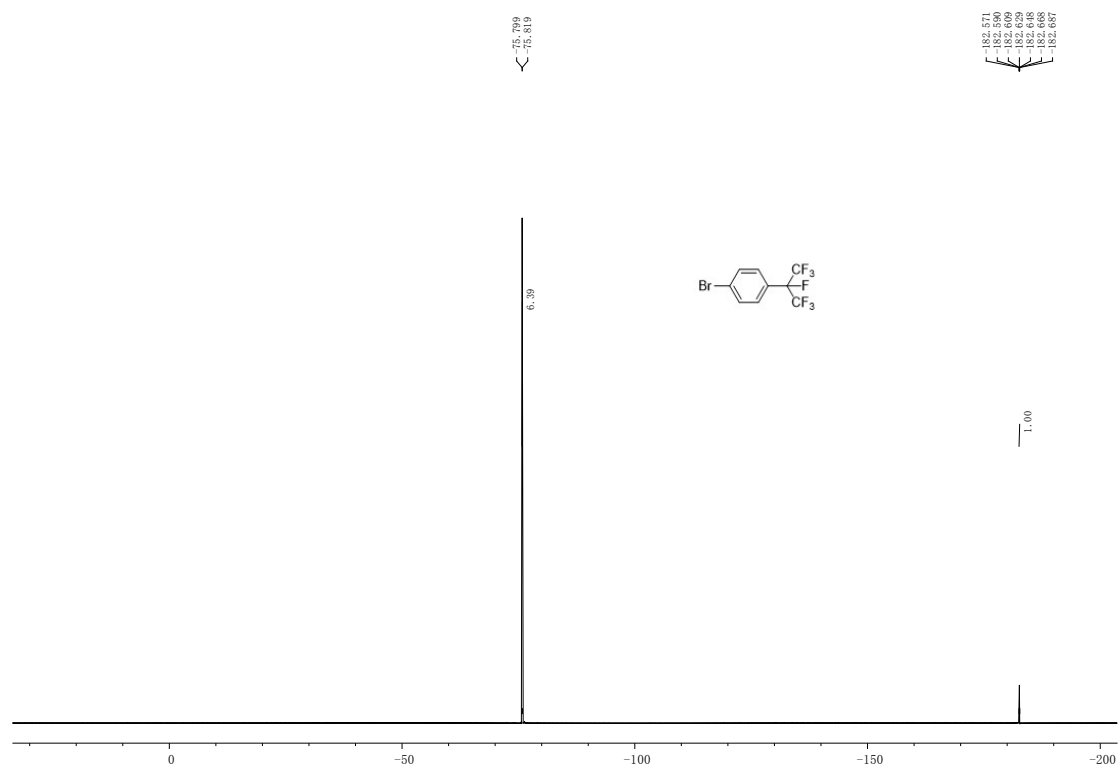

<sup>13</sup>C NMR (101 MHz, CDCl<sub>3</sub>) spectrum of 1-bromo-4-(perfluoropropan-2-yl)benzene **3n**

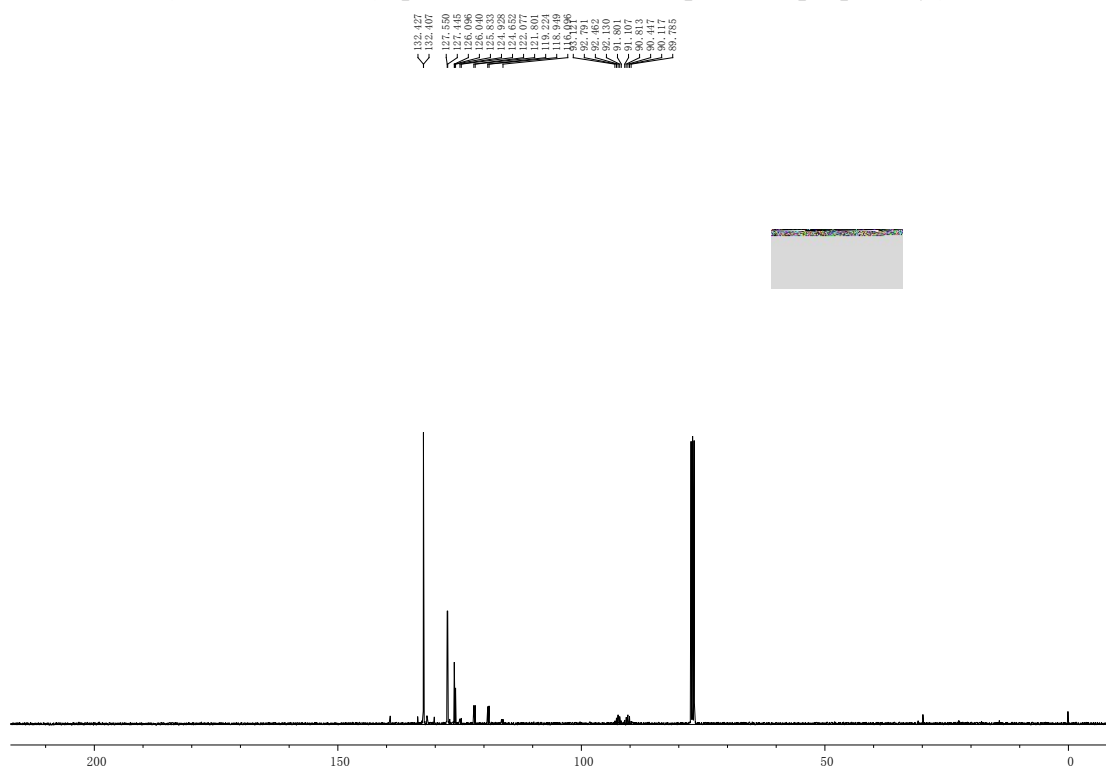

<sup>1</sup>H NMR (400 MHz, CDCl<sub>3</sub>) spectrum of 1-iodo-2-(perfluoropropan-2-yl)benzene **3o**

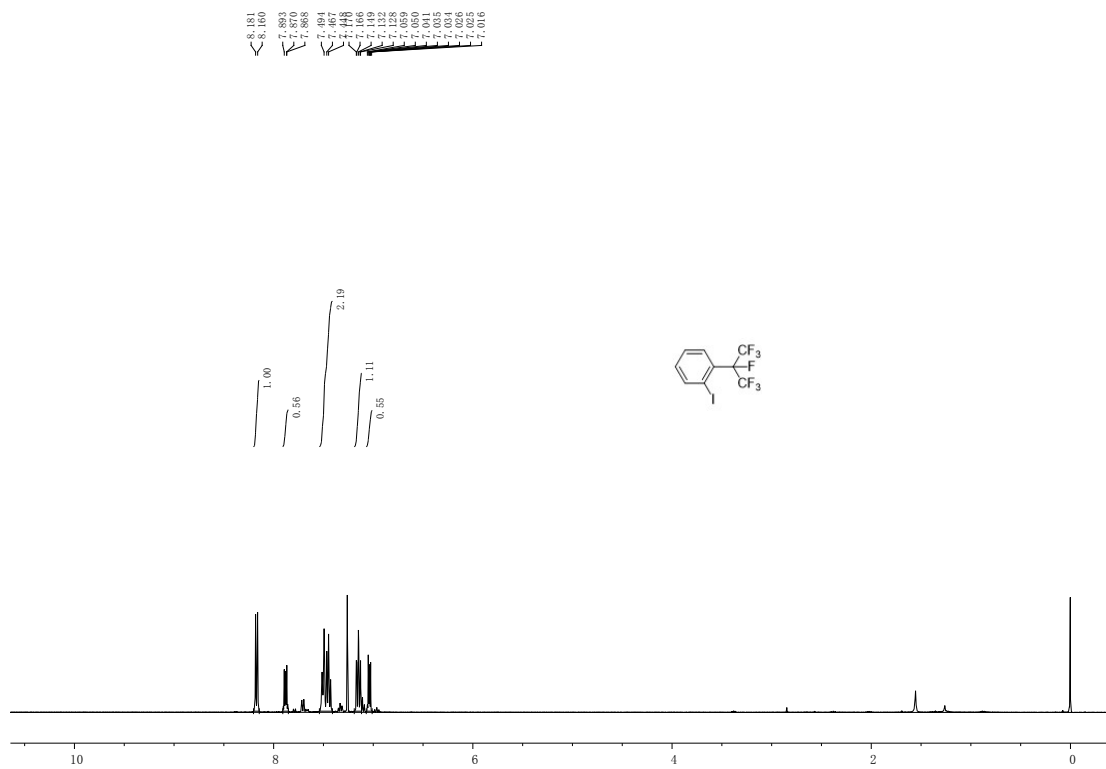

**$^{19}\text{F}$  NMR (376 MHz,  $\text{CDCl}_3$ ) spectrum of 1-iodo-2-(perfluoropropan-2-yl)benzene 3o**

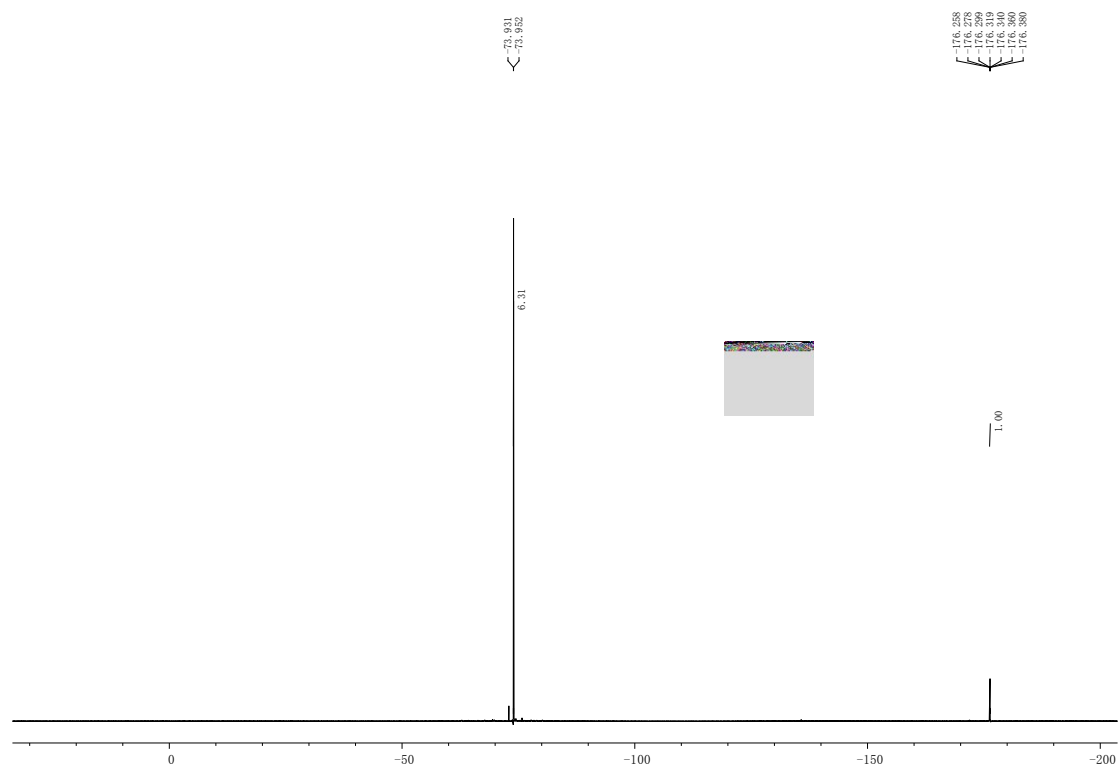

**$^{13}\text{C}$  NMR (101 MHz,  $\text{CDCl}_3$ ) spectrum of 1-iodo-2-(perfluoropropan-2-yl)benzene 3o**

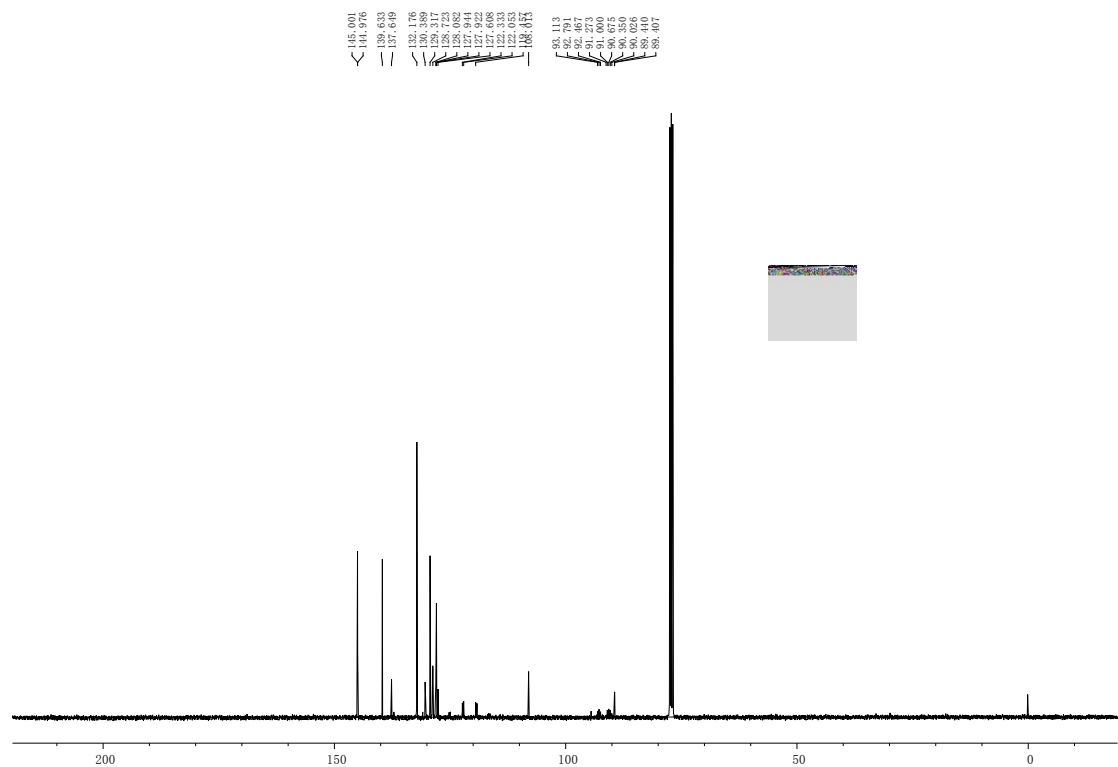

**<sup>1</sup>H NMR (400 MHz, CDCl<sub>3</sub>) spectrum of 1-iodo-3-(perfluoropropan-2-yl)benzene 3p**

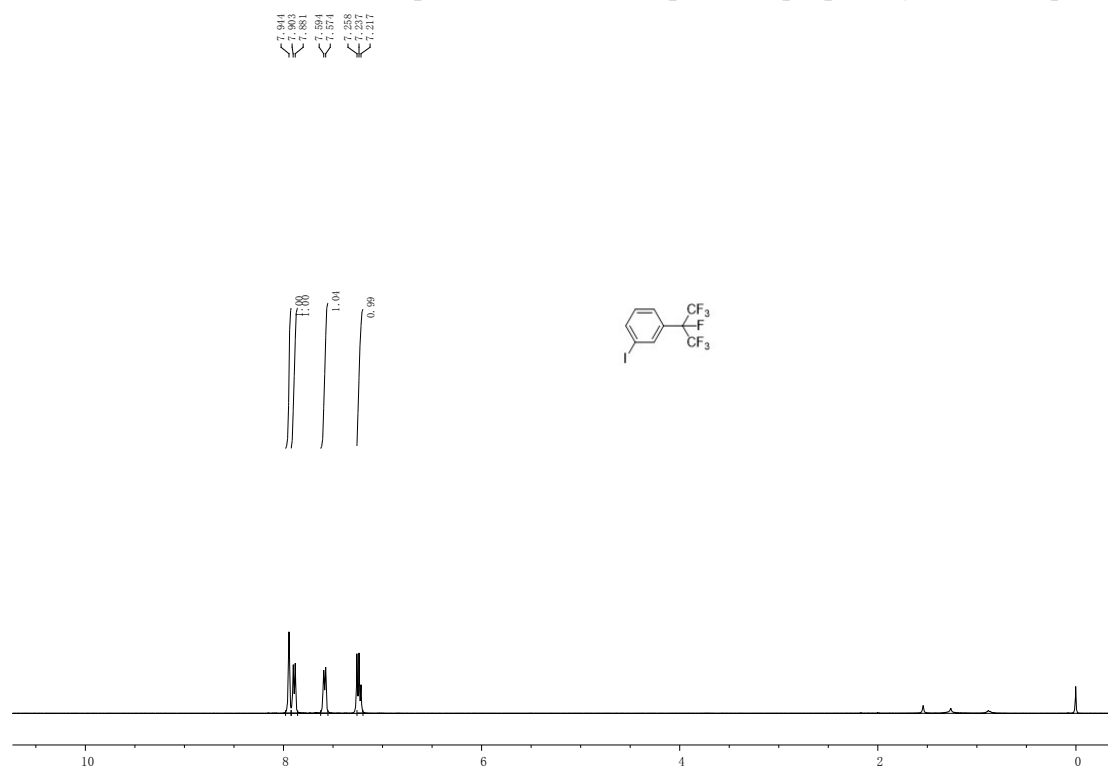

**<sup>19</sup>F NMR (376 MHz, CDCl<sub>3</sub>) spectrum of 1-iodo-3-(perfluoropropan-2-yl)benzene 3p**

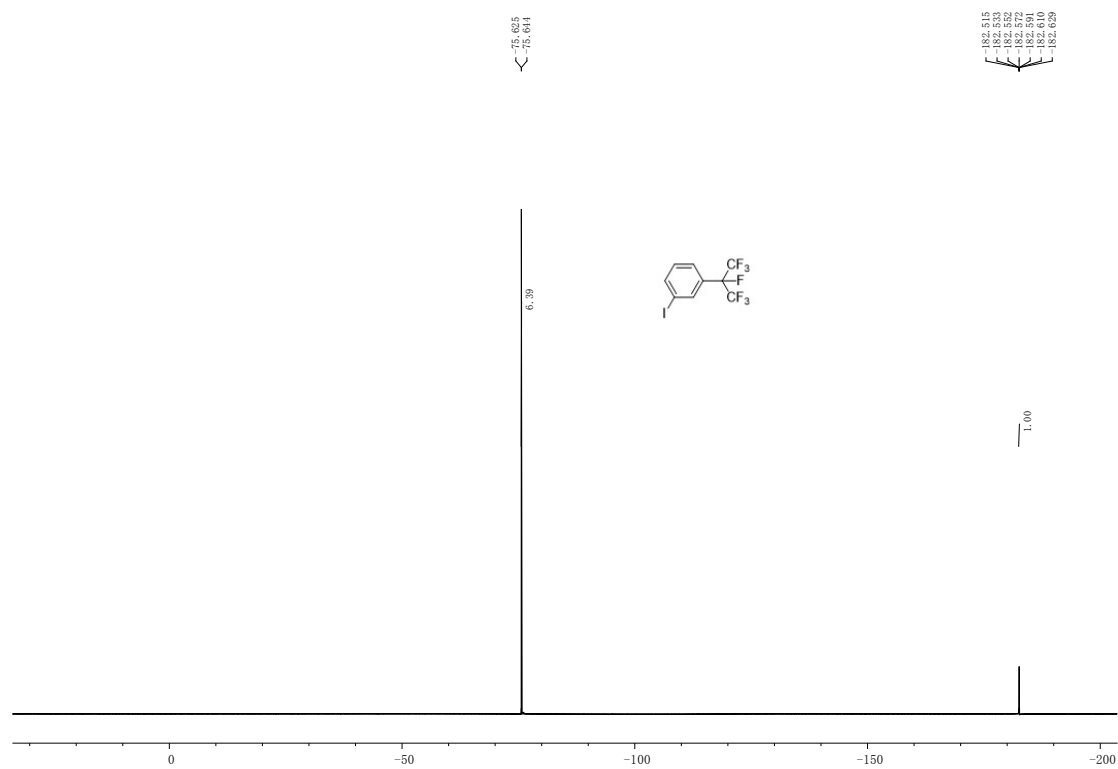

**<sup>13</sup>C NMR (101 MHz, CDCl<sub>3</sub>) spectrum of 1-iodo-3-(perfluoropropan-2-yl)benzene 3p**

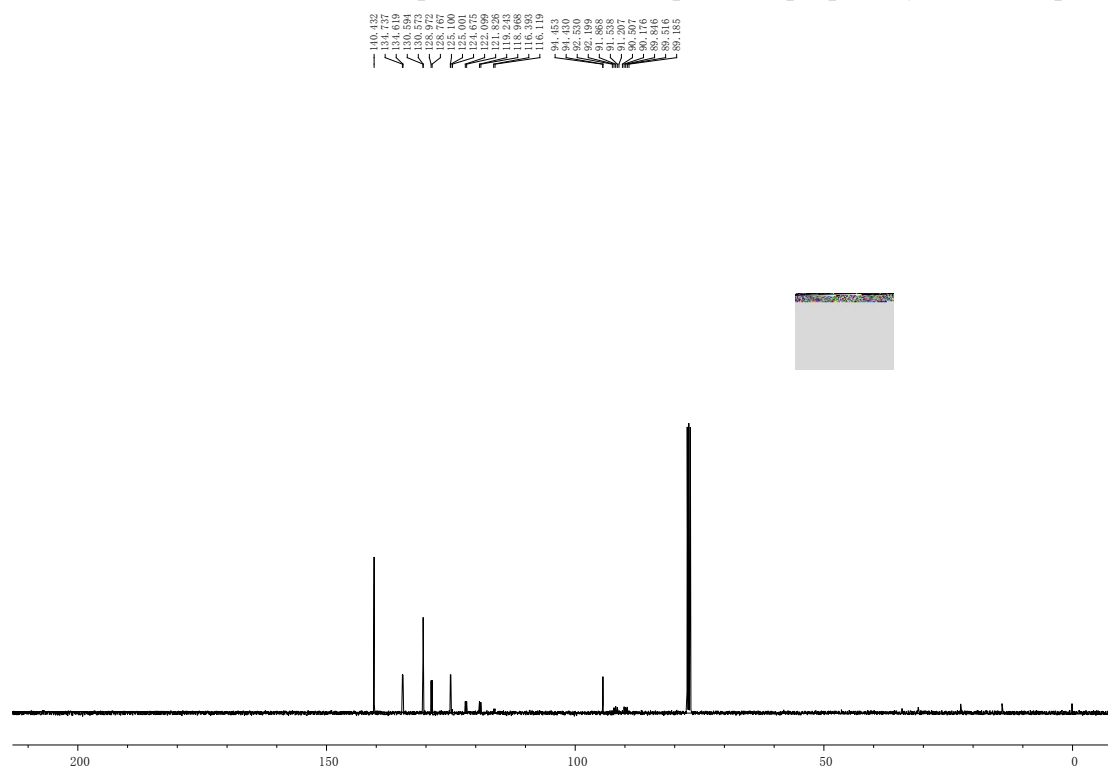

**<sup>1</sup>H NMR (400 MHz, CDCl<sub>3</sub>) spectrum of 1-iodo-4-(perfluoropropan-2-yl)benzene 3q**

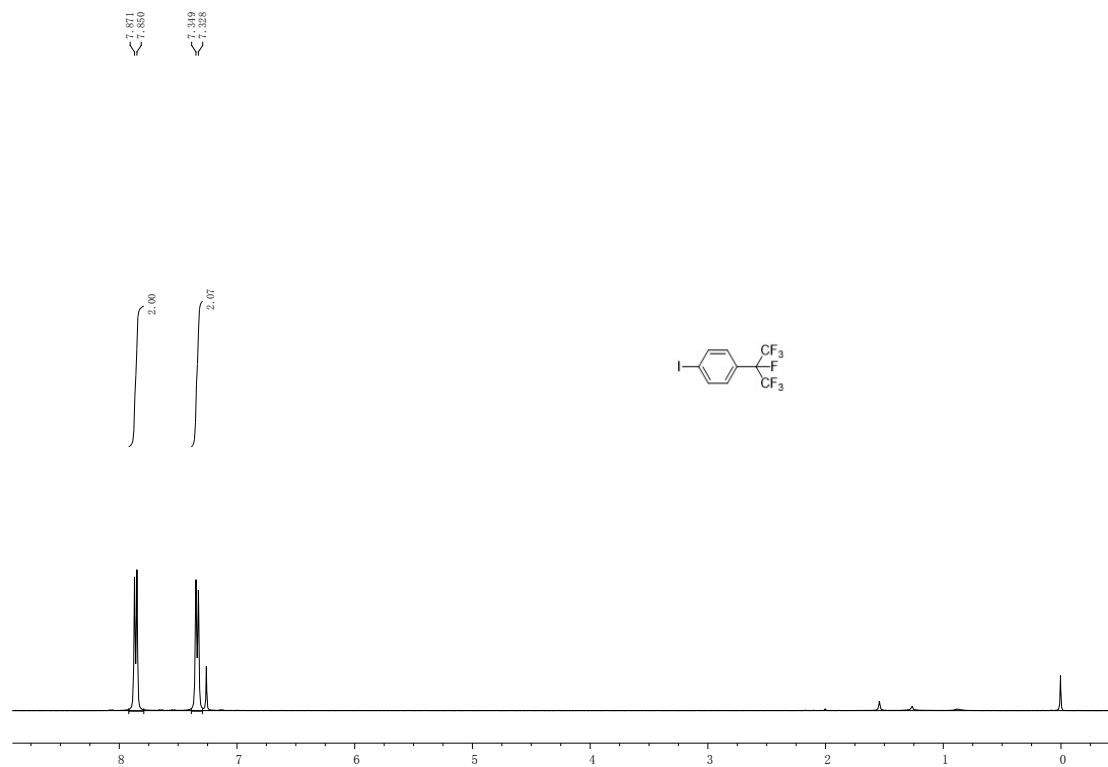



**<sup>19</sup>F NMR (376 MHz, CDCl<sub>3</sub>) spectrum of 1-iodo-4-(perfluoropropan-2-yl)benzene 3q**

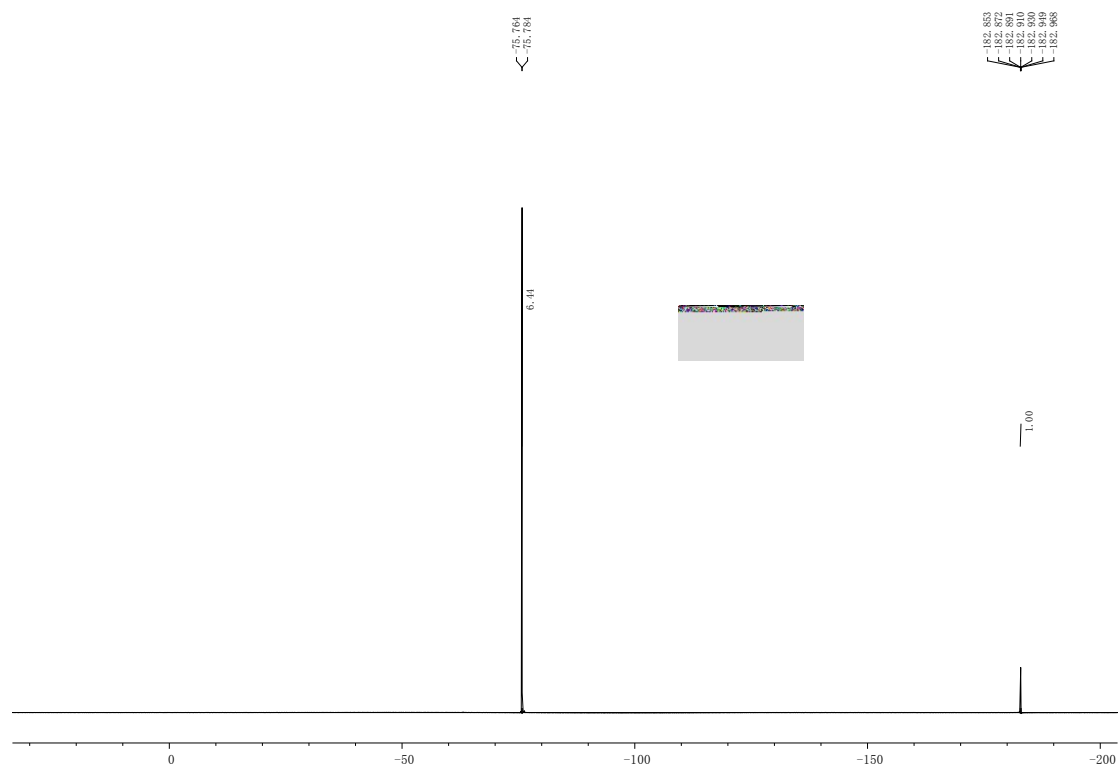

**<sup>13</sup>C NMR (101 MHz, CDCl<sub>3</sub>) spectrum of 1-iodo-4-(perfluoropropan-2-yl)benzene 3q**

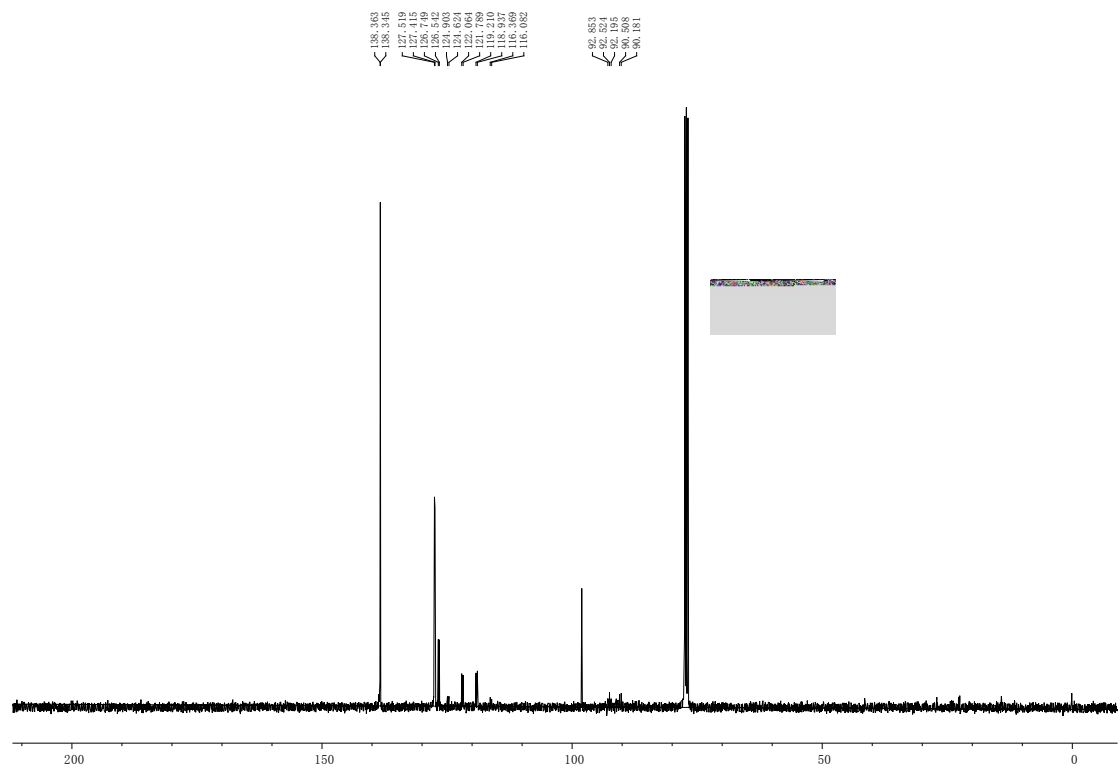

**<sup>1</sup>H NMR (400 MHz, CDCl<sub>3</sub>) spectrum of 4-chloro-2-iodo-1-(perfluoropropan-2-yl)benzene**  
**3r**

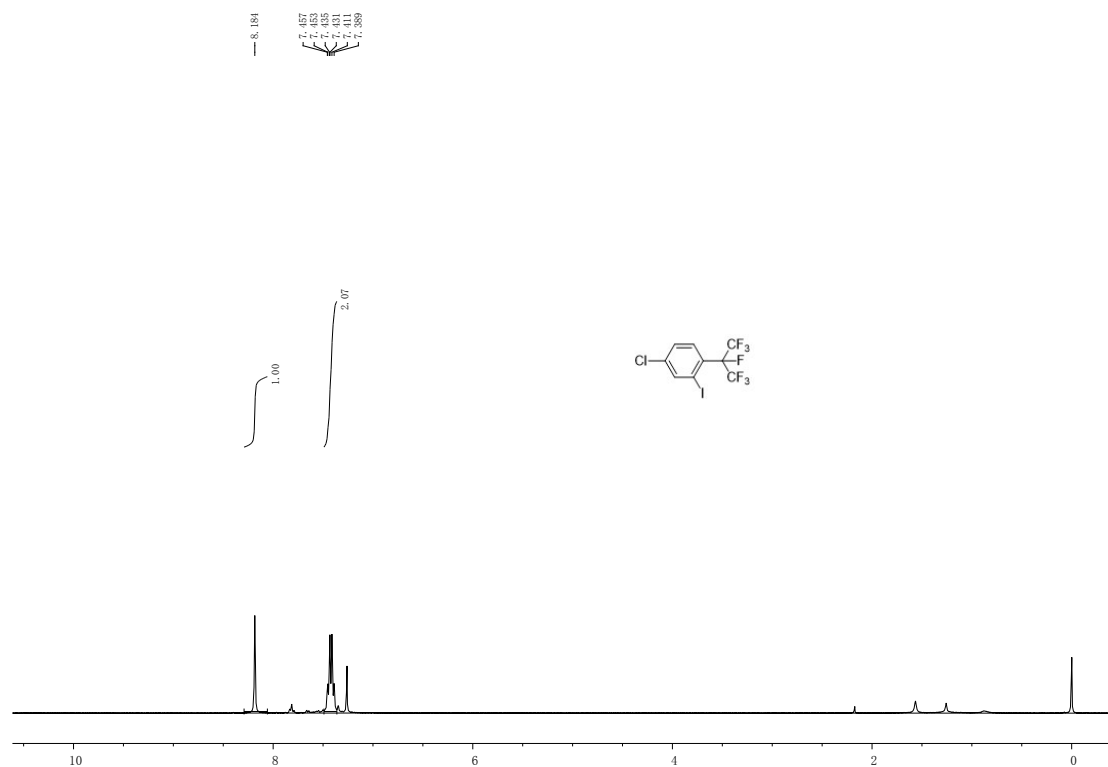

**<sup>19</sup>F NMR (376 MHz, CDCl<sub>3</sub>) spectrum of 4-chloro-2-iodo-1-(perfluoropropan-2-yl)benzene**  
**3r**

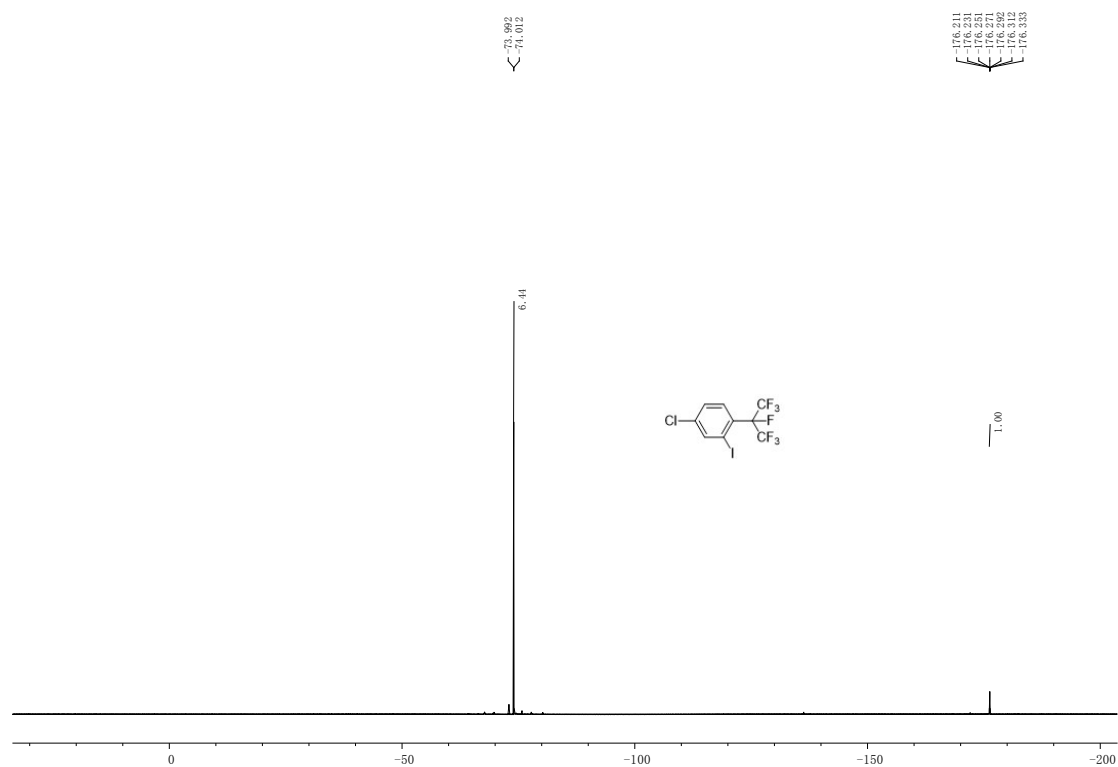

**$^{13}\text{C}$  NMR (101 MHz,  $\text{CDCl}_3$ ) spectrum of 4-chloro-2-iodo-1-(perfluoropropan-2-yl)benzene**

**3r**

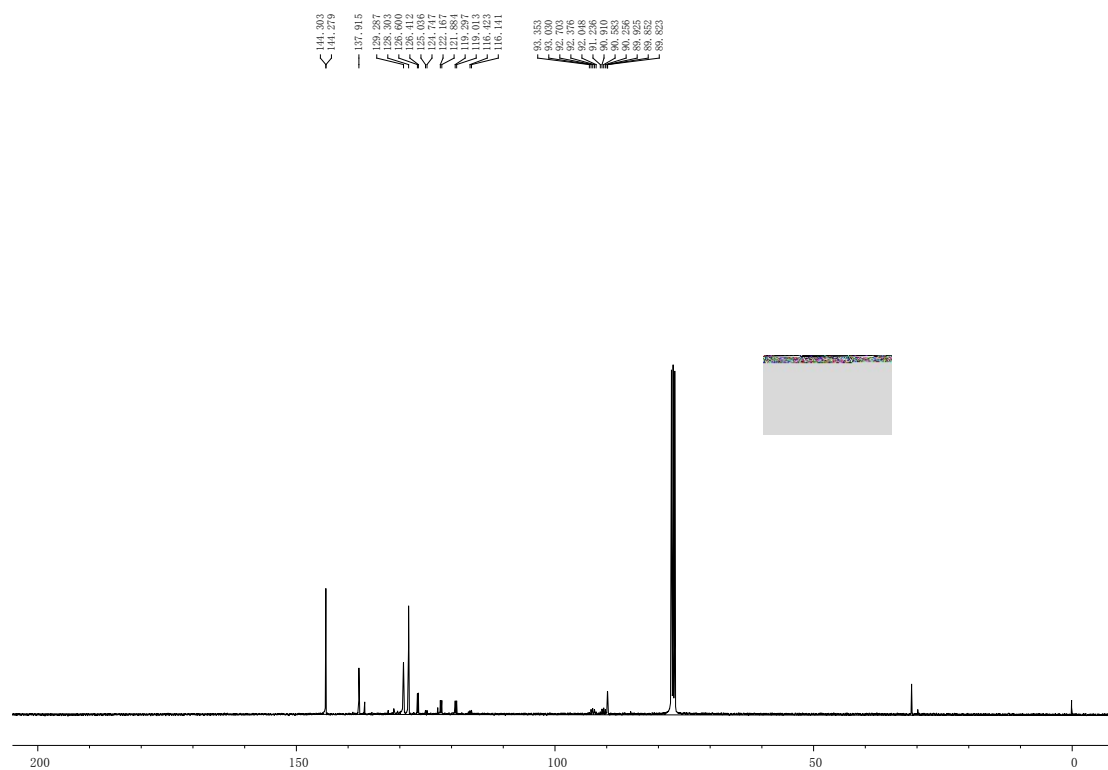

**$^1\text{H}$  NMR (400 MHz,  $\text{CDCl}_3$ ) spectrum of 4-(perfluoropropan-2-yl)-1,1'-biphenyl 3s**

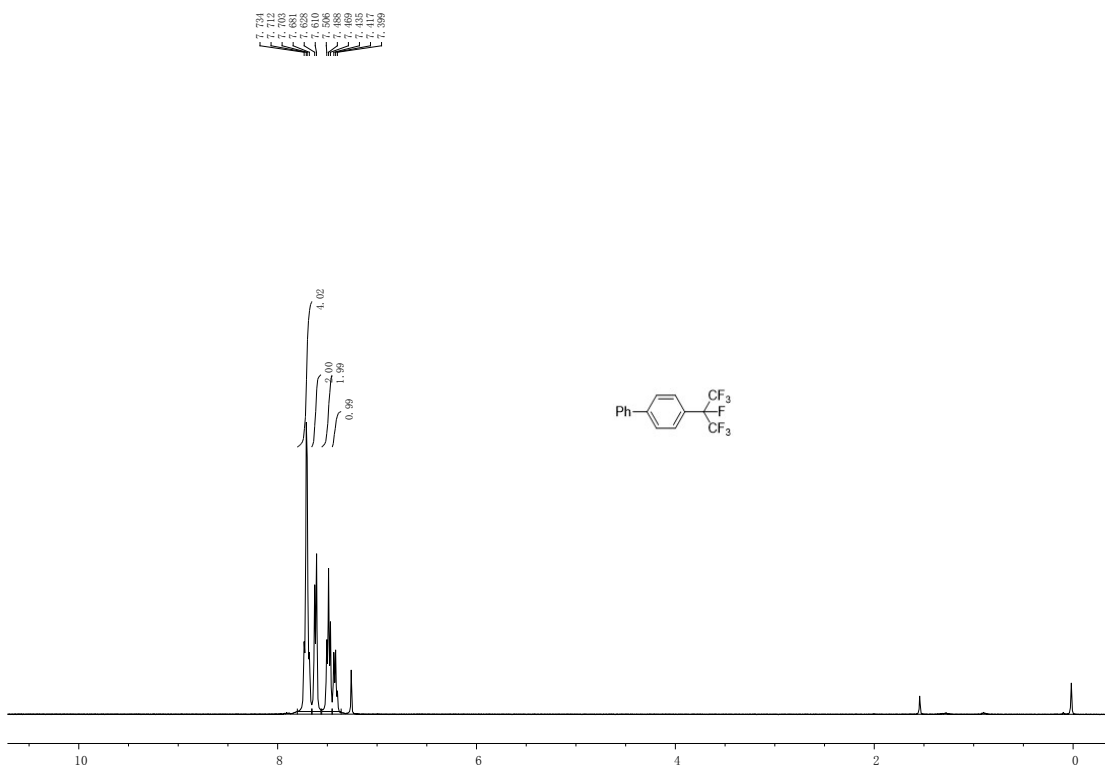

<sup>19</sup>F NMR (376 MHz, CDCl<sub>3</sub>) spectrum of 4-(perfluoropropan-2-yl)-1,1'-biphenyl 3s

77.5, 69.6  
77.5, 69.6

46.7  
33.3  
32.8  
32.3  
32.3  
32.3  
32.3  
32.3

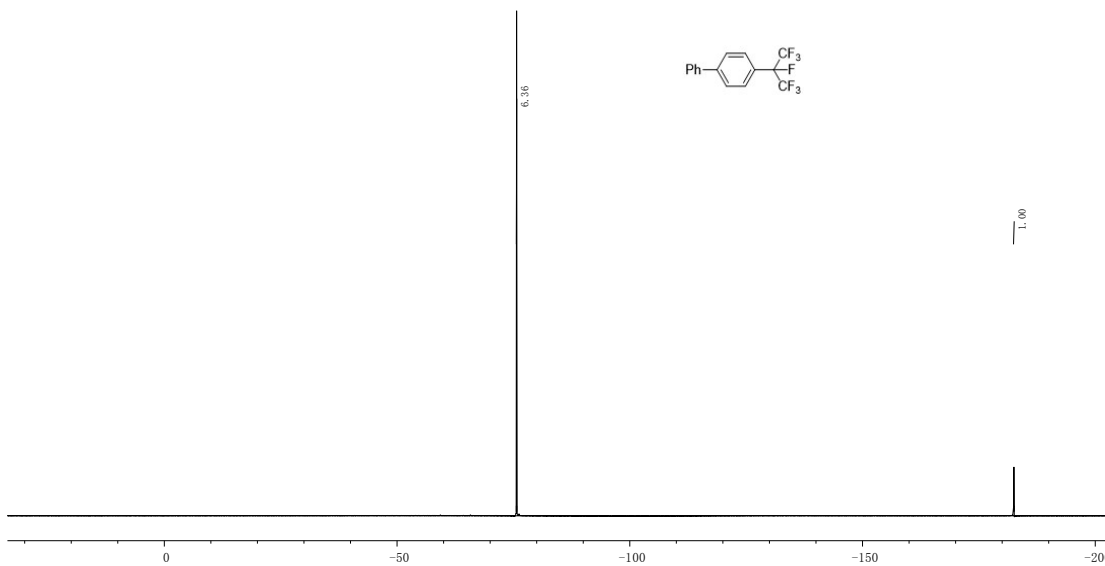

<sup>13</sup>C NMR (101 MHz, CDCl<sub>3</sub>) spectrum of 4-(perfluoropropan-2-yl)-1,1'-biphenyl 3s

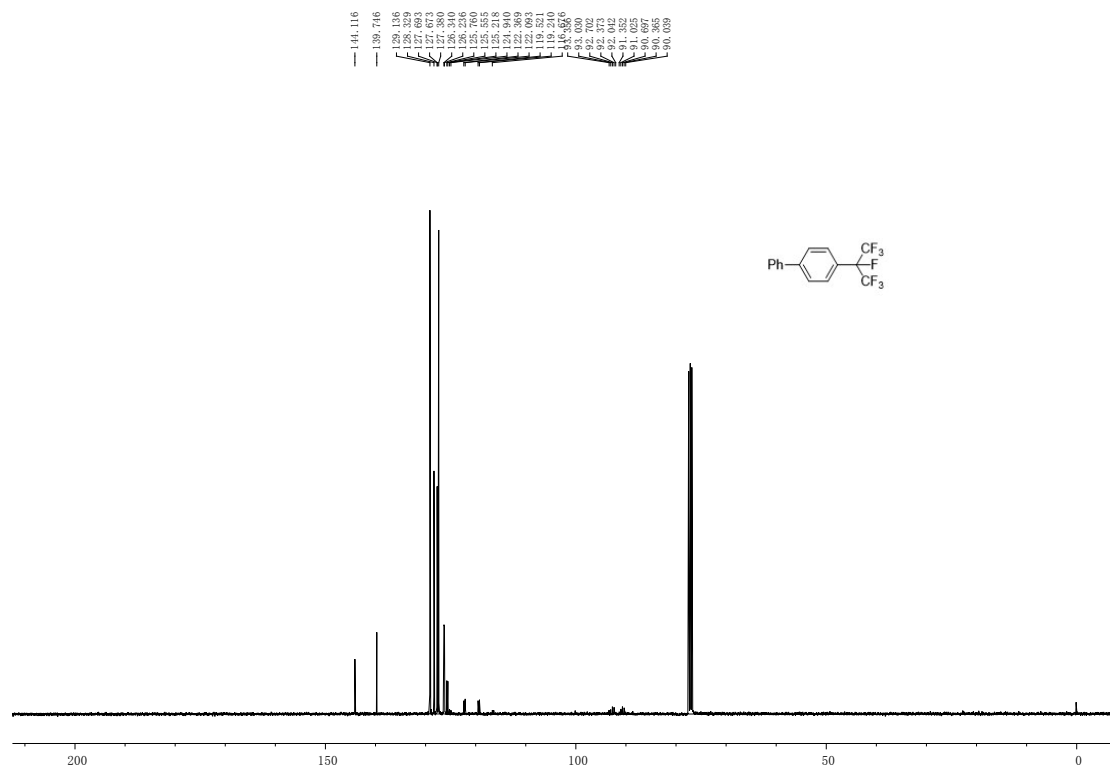

<sup>1</sup>H NMR (400 MHz, CDCl<sub>3</sub>) spectrum of 2-(perfluoropropan-2-yl)-1,1'-biphenyl 3t

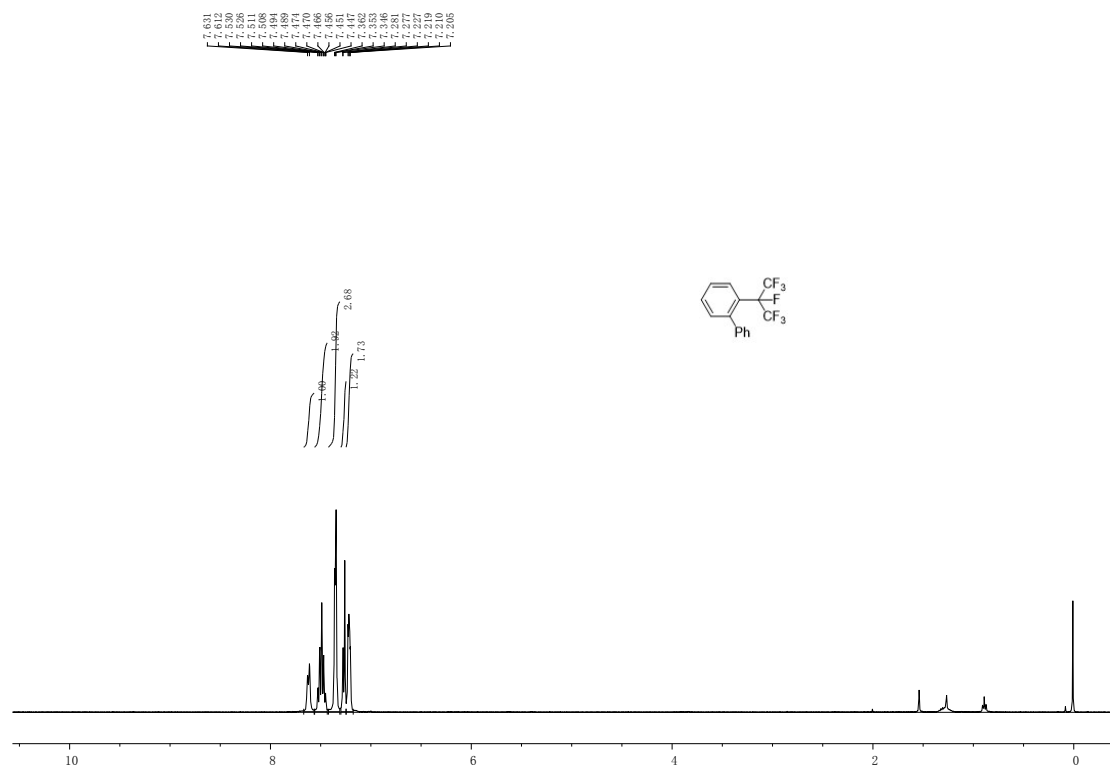

<sup>19</sup>F NMR (376 MHz, CDCl<sub>3</sub>) spectrum of 2-(perfluoropropan-2-yl)-1,1'-biphenyl 3t

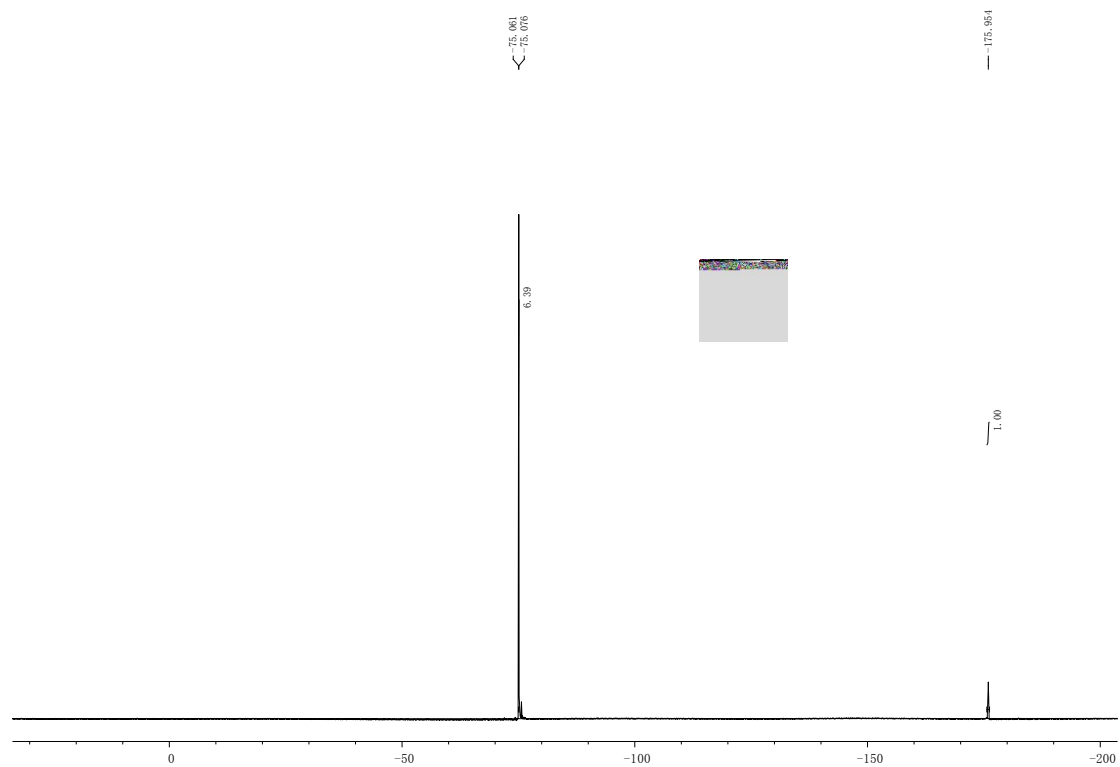

$^{13}\text{C}$  NMR (101 MHz,  $\text{CDCl}_3$ ) spectrum of 2-(perfluoropropan-2-yl)-1,1'-biphenyl 3t

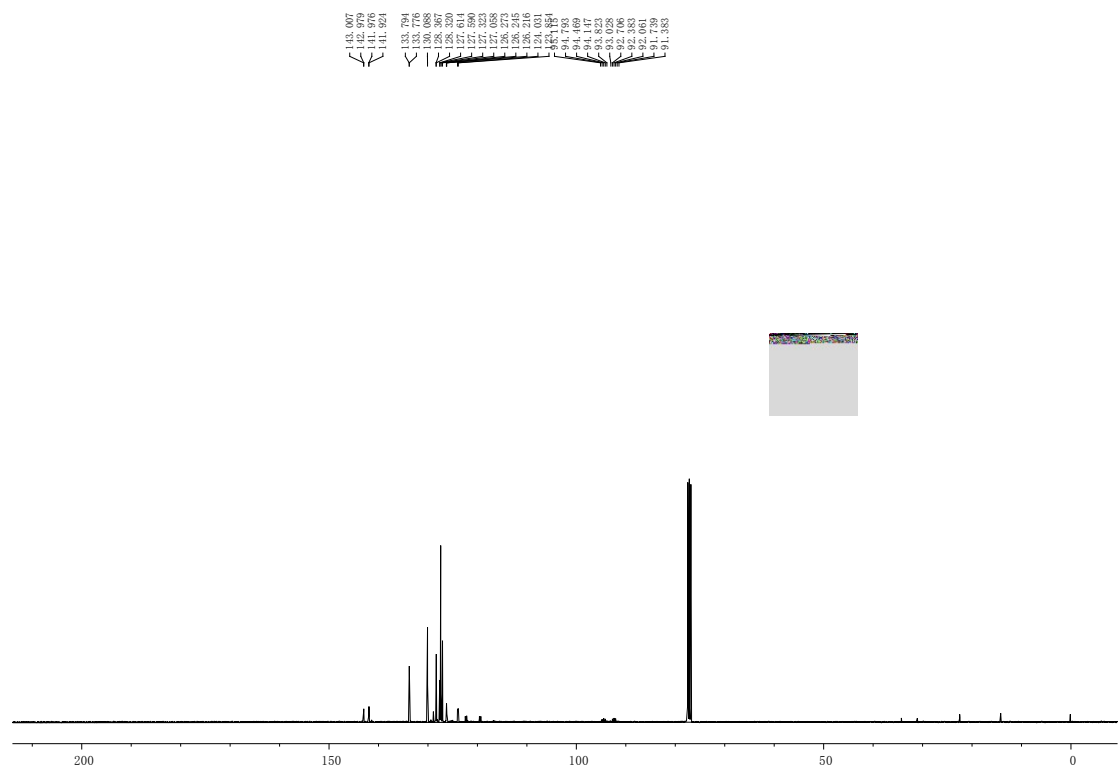

$^1\text{H}$  NMR (400 MHz,  $\text{CDCl}_3$ ) spectrum of 2-(perfluoropropan-2-yl)naphthalene 3u

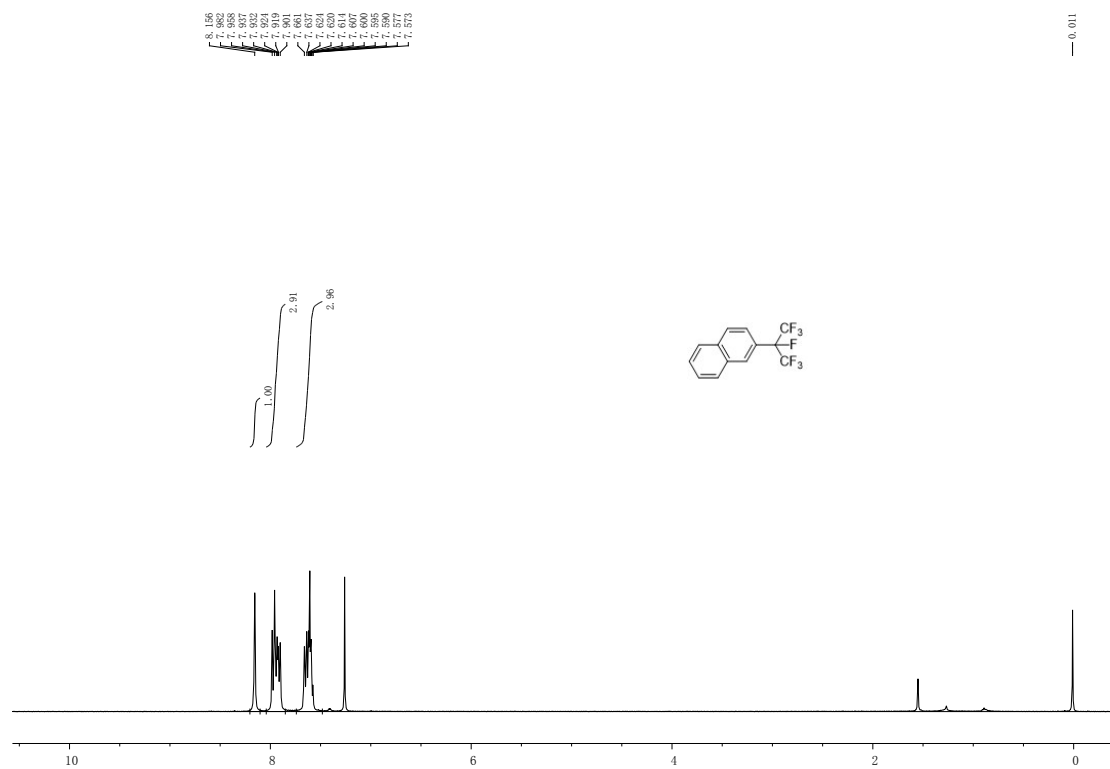

**$^{19}\text{F}$  NMR (376 MHz,  $\text{CDCl}_3$ ) spectrum of 2-(perfluoropropan-2-yl)naphthalene **3u****

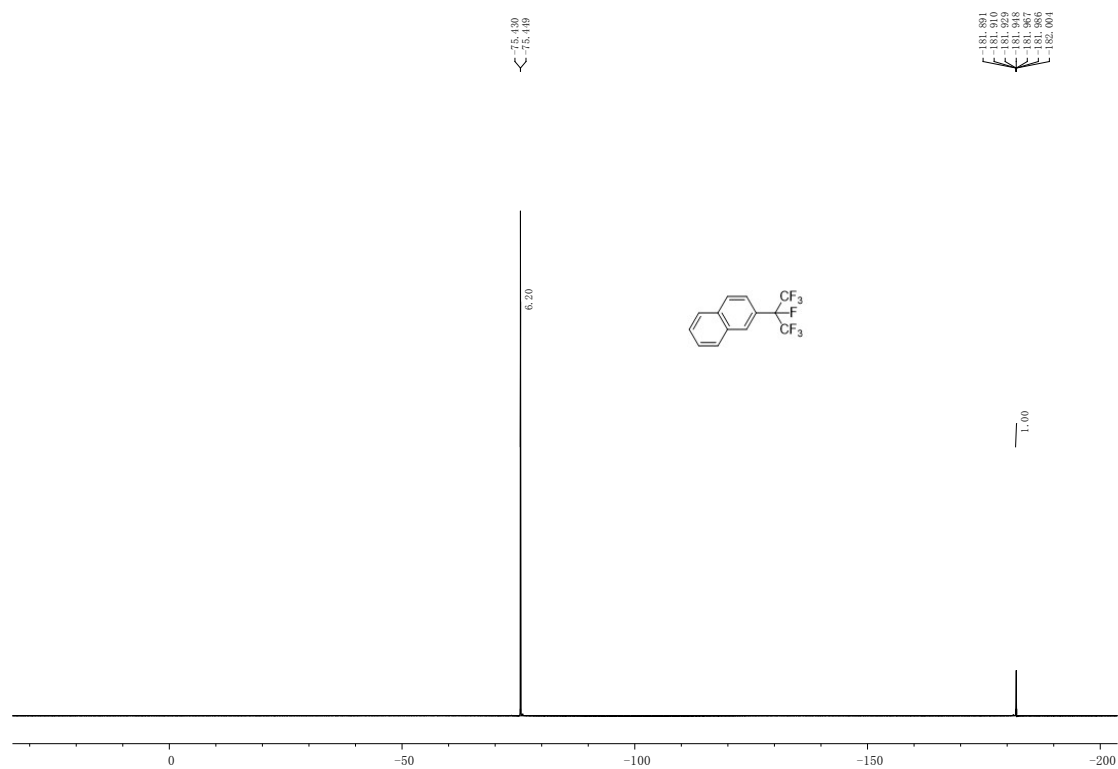

**$^{13}\text{C}$  NMR (101 MHz,  $\text{CDCl}_3$ ) spectrum of 2-(perfluoropropan-2-yl)naphthalene **3u****

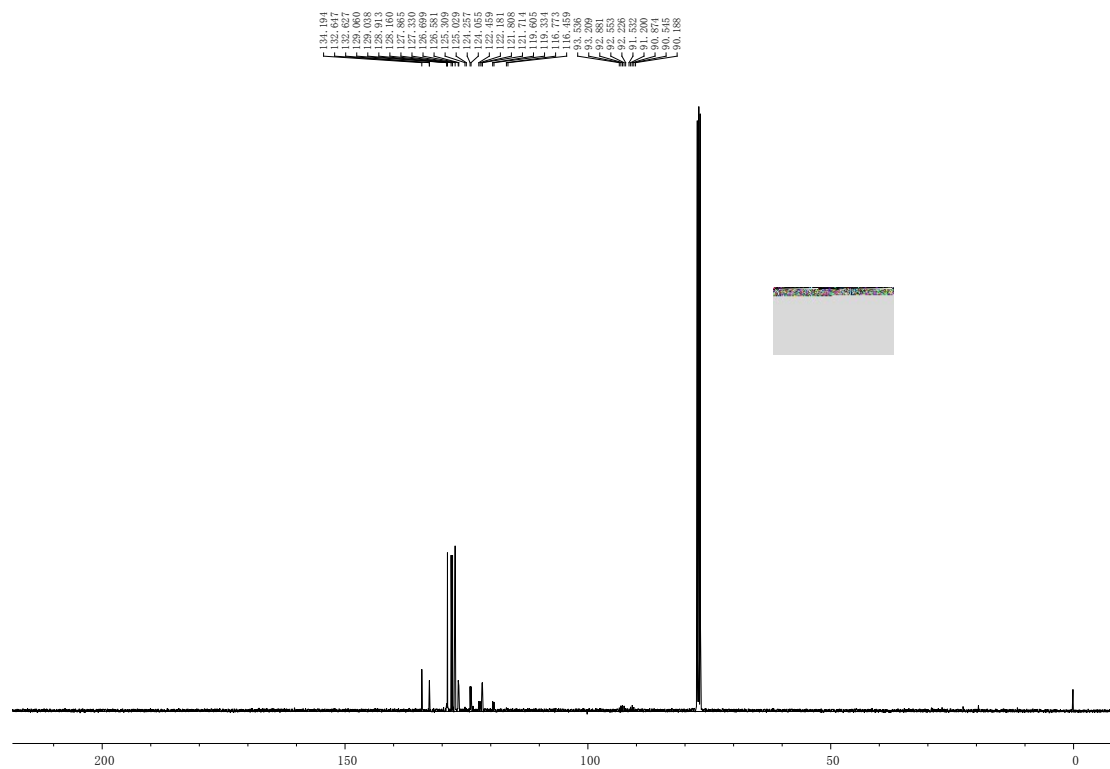

<sup>1</sup>H NMR (400 MHz, CDCl<sub>3</sub>) spectrum of 6-(perfluoropropan-2-yl)quinolone 3v

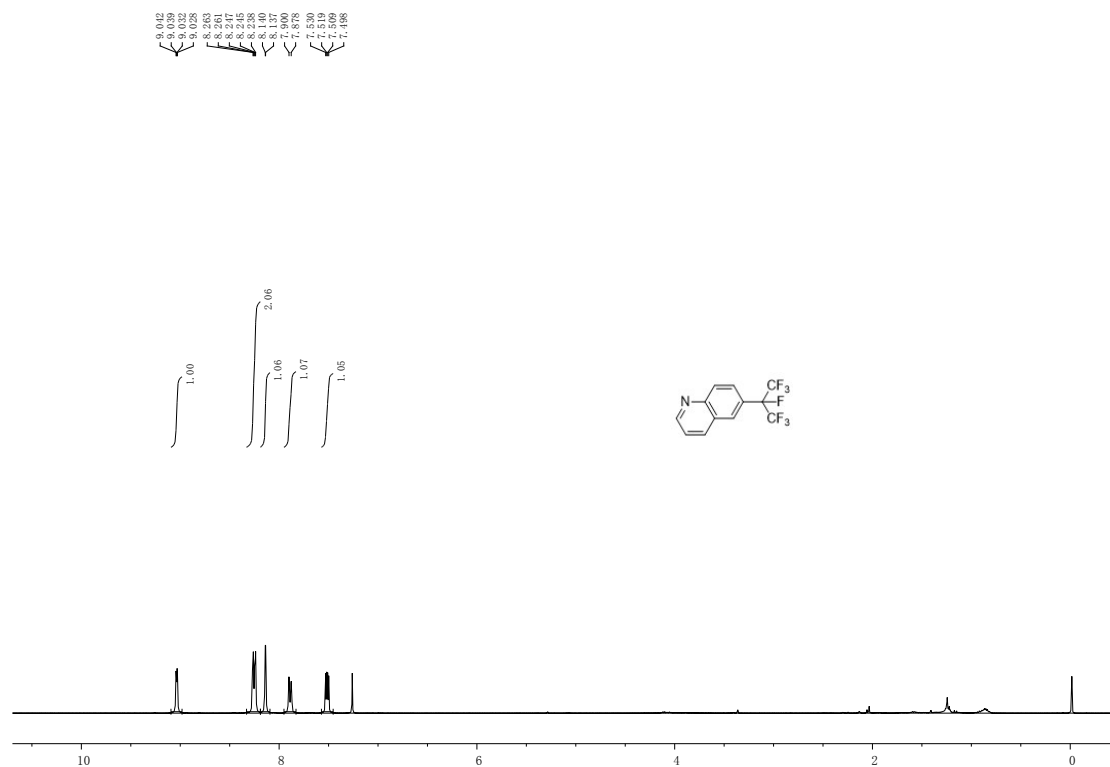

<sup>19</sup>F NMR (376 MHz, CDCl<sub>3</sub>) spectrum of 6-(perfluoropropan-2-yl)quinolone 3v



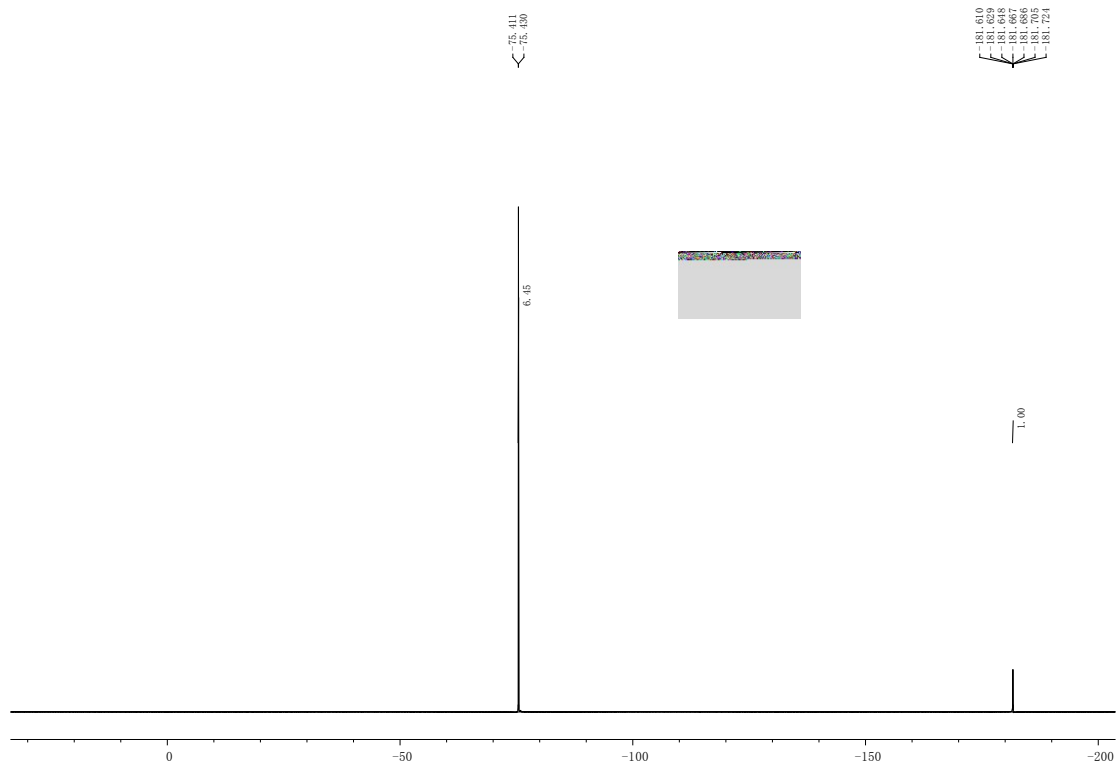

**<sup>13</sup>C NMR (101 MHz, CDCl<sub>3</sub>) spectrum of 6-(perfluoropropan-2-yl)quinoline 3v**

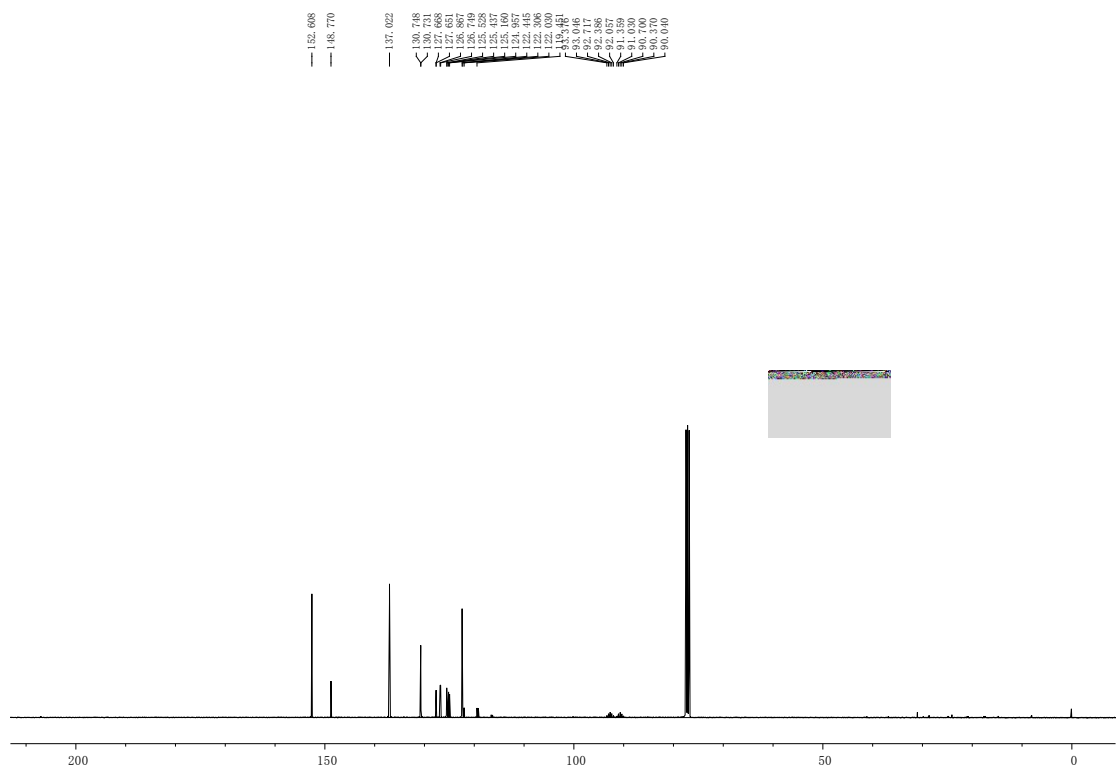

**<sup>1</sup>H NMR (400 MHz, CDCl<sub>3</sub>) spectrum of 5-(perfluoropropan-2-yl)benzo[d][1,3]dioxole 3w**

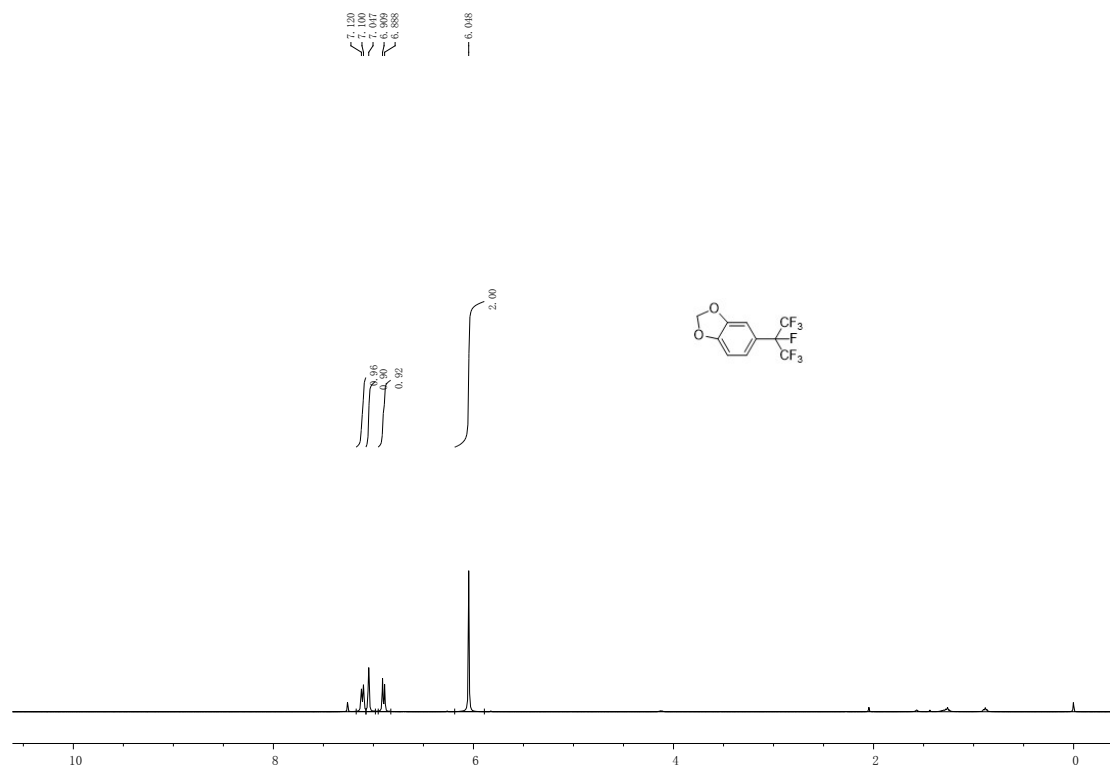

<sup>19</sup>F NMR (376 MHz, CDCl<sub>3</sub>) spectrum of 5-(perfluoropropan-2-yl)benzo[d][1,3]dioxole 3w

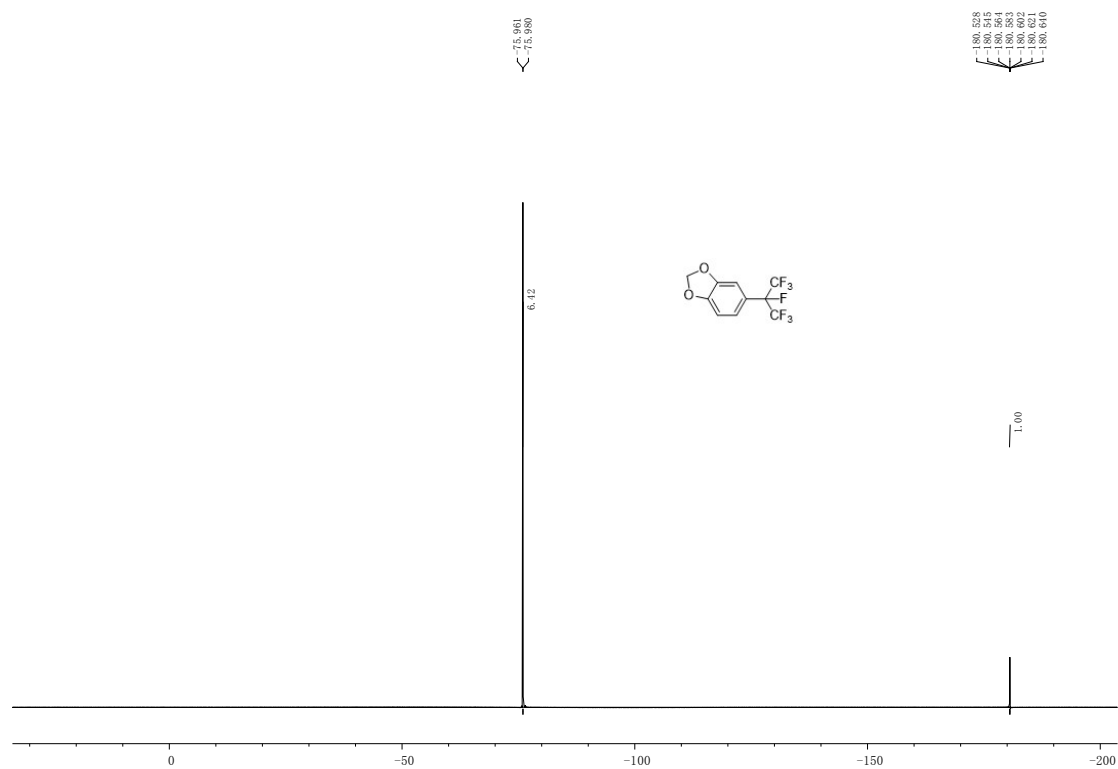

<sup>13</sup>C NMR (101 MHz, CDCl<sub>3</sub>) spectrum of 5-(perfluoropropan-2-yl)benzo[d][1,3]dioxole 3w

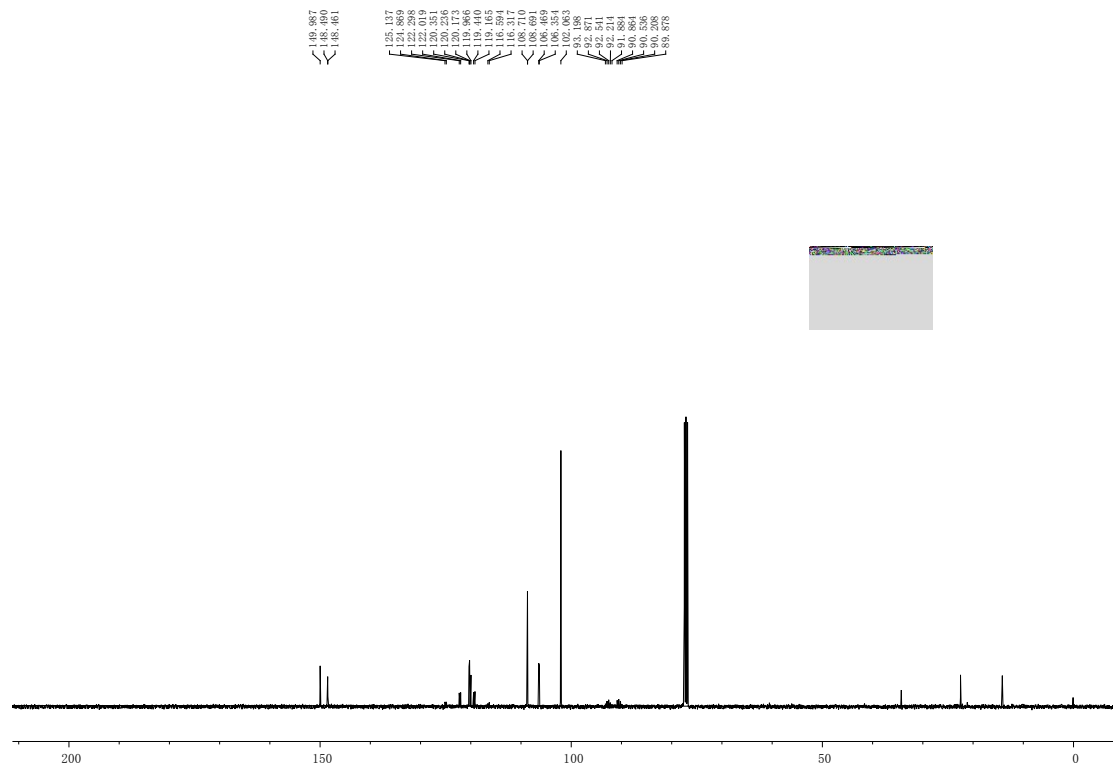

Supplement: c5qo00388a1.pdf [file c5qo00388a1.pdf]
